1 Submitted to *mBio* on: 31 March 2021

2 **Sex differences in lung imaging and SARS-CoV-2 antibody responses in a COVID-19**  
3 **golden Syrian hamster model**

4

5 Santosh Dhakal<sup>a,\*</sup>, Camilo A. Ruiz-Bedoya<sup>b,\*</sup>, Ruifeng Zhou<sup>a</sup>, Patrick S. Creisher<sup>a</sup>, Jason S.  
6 Villano<sup>c</sup>, Kirsten Littlefield<sup>a</sup>, Jennie Ruelas Castillo<sup>d</sup>, Paula Marinho<sup>a</sup>, Anne Jedlicka<sup>a</sup>, Alvaro A.  
7 Ordonez<sup>b</sup>, Natalia Majewski<sup>c</sup>, Michael J. Betenbaugh<sup>c</sup>, Kelly Flavahan<sup>b</sup>, Alice L. Mueller<sup>a</sup>,  
8 Monika M. Looney<sup>d</sup>, Darla Quijada<sup>d</sup>, Filipa Mota<sup>b</sup>, Sarah E. Beck<sup>c</sup>, Jacqueline Brockhurst<sup>c</sup>,  
9 Alicia Braxton<sup>c</sup>, Natalie Castell<sup>c</sup>, Franco R. D'Alessio<sup>d</sup>, Kelly A. Metcalf Pate<sup>c</sup>, Petros C.  
10 Karakousis<sup>d</sup>, Joseph L. Mankowski<sup>c,†</sup>, Andrew Pekosz<sup>a,†</sup>, Sanjay K. Jain<sup>b,†</sup>, and Sabra L. Klein<sup>a,†</sup>  
11 for the Johns Hopkins COVID-19 Hamster Study Group<sup>‡</sup>

12 <sup>a</sup>W. Harry Feinstone Department of Molecular Microbiology and Immunology, The Johns  
13 Hopkins Bloomberg School of Public Health, Baltimore, Maryland, USA

14 <sup>b</sup>Department of Pediatrics, The Johns Hopkins University School of Medicine, Baltimore,  
15 Maryland, USA

16 <sup>c</sup>Department of Molecular and Comparative Pathobiology, The Johns Hopkins School of  
17 Medicine, Baltimore, Maryland, USA

18 <sup>d</sup>Department of Medicine, The Johns Hopkins School of Medicine, Baltimore, Maryland, USA

19 <sup>e</sup>Advanced Mammalian Biomanufacturing Innovation Center, Department of Chemical and  
20 Biomolecular Engineering, Johns Hopkins University, Baltimore, Maryland, USA.

21 <sup>f</sup>Department of Epidemiology, The Johns Hopkins Bloomberg School of Public Health,  
22 Baltimore, Maryland, USA

23 <sup>g</sup>Department of Oncology, The Johns Hopkins School of Medicine, The Sidney Kimmel  
24 Comprehensive Cancer Center, Baltimore, MD, USA

25 \*co-first authors

26 †To whom correspondence should be addressed: Sabra Klein, [sklein2@jhu.edu](mailto:sklein2@jhu.edu)  
27 Sanjay Jain, [sjain5@jhmi.edu](mailto:sjain5@jhmi.edu), Andrew Pekosz, [apekosz1@jhu.edu](mailto:apekosz1@jhu.edu), Joseph Mankowski,  
28 [jmankows@jhmi.edu](mailto:jmankows@jhmi.edu)

29 ‡additional Johns Hopkins COVID-19 Hamster Study Group members: Cory F. Brayton<sup>c</sup>, Lisa  
30 Pieterse<sup>a</sup>, Bess Carlson<sup>c</sup>, Selena Guerrero-Martin<sup>c</sup>, Eric K. Hutchinson<sup>c</sup>, Andrew L. Johanson<sup>c</sup>,  
31 Maggie Lowman<sup>c</sup>, Amanda Maxwell<sup>c</sup>, Megan E. McCarron<sup>c</sup>, Kathleen R. Mulka<sup>c</sup>, Suzanne E.  
32 Queen<sup>c</sup>, Erin N. Shirk<sup>c</sup>, Clarisse V. Solis<sup>c</sup>, Mitchel Stover<sup>c</sup>, Patrick M. Tarwater<sup>f</sup>, Rebecca T.  
33 Veenhuis<sup>c</sup>, Rachel Vistein<sup>c</sup>, and Cynthia A. Zahn<sup>g</sup>

34 **Key words:** animal model, COVID-19, sex differences, SARS-CoV-2 variants, receptor binding  
35 domain

36 **Running title:** Sex differences in SARS-CoV-2 in golden Syrian hamsters

37 **One Sentence Summary:** Following SARS-CoV-2 infection, male hamsters experience worse  
38 clinical disease and have lower antiviral antibody responses than females.

39 **Abstract:**

40           In the ongoing coronavirus disease 2019 (COVID-19) pandemic caused by the severe  
41 acute respiratory syndrome coronavirus 2 (SARS-CoV-2), more severe outcomes are reported in  
42 males compared with females, including hospitalizations and deaths. Animal models can provide  
43 an opportunity to mechanistically interrogate causes of sex differences in the pathogenesis of  
44 SARS-CoV-2. Adult male and female golden Syrian hamsters (8-10 weeks of age) were  
45 inoculated intranasally with  $10^5$  TCID<sub>50</sub> of SARS-CoV-2/USA-WA1/2020 and euthanized at  
46 several time points during the acute (i.e., virus actively replicating) and recovery (i.e., after the  
47 infectious virus has been cleared) phases of infection. There was no mortality, but infected male  
48 hamsters experienced greater morbidity, losing a greater percentage of body mass, developing  
49 more extensive pneumonia as noted on chest computed tomography, and recovering more slowly  
50 than females. Treatment of male hamsters with estradiol did not alter pulmonary damage. Virus  
51 titers in respiratory tissues, including nasal turbinates, trachea, and lungs, and pulmonary  
52 cytokine concentrations, including IFN $\beta$  and TNF $\alpha$ , were comparable between the sexes.  
53 However, during the recovery phase of infection, females mounted two-fold greater IgM, IgG,  
54 and IgA responses against the receptor-binding domain of the spike protein (S-RBD) in both  
55 plasma and respiratory tissues. Female hamsters also had significantly greater IgG antibodies  
56 against whole inactivated SARS-CoV-2 and mutant S-RBDs, as well as virus neutralizing  
57 antibodies in plasma. The development of an animal model to study COVID-19 sex differences  
58 will allow for a greater mechanistic understanding of the SARS-CoV-2 associated sex  
59 differences seen in the human population.

60

61

62 **Importance:**

63 Men experience more severe outcomes from COVID-19 than women. Golden Syrian hamsters  
64 were used to explore sex differences in the pathogenesis of a human clinical isolate of SARS-  
65 CoV-2. After inoculation, male hamsters experienced greater sickness, developed more severe  
66 lung pathology, and recovered more slowly than females. Sex differences in disease could not be  
67 reversed by estradiol treatment in males and were not explained by either virus replication  
68 kinetics or the concentrations of inflammatory cytokines in the lungs. During the recovery  
69 period, antiviral antibody responses in the respiratory tract and plasma, including to newly  
70 emerging SARS-CoV-2 variants, were greater in females than male hamsters. Greater lung  
71 pathology during the acute phase combined with reduced antiviral antibody responses during the  
72 recovery phase of infection in males than females illustrate the utility of golden Syrian hamsters  
73 as a model to explore sex differences in the pathogenesis of SARS-CoV-2 and vaccine-induced  
74 immunity and protection.

75 **Introduction**

76 At the start of the coronavirus disease 2019 (COVID-19) pandemic, early publications  
77 from Wuhan, China (1, 2) and European countries (3) began reporting male biases in  
78 hospitalization, intensive care unit (ICU) admissions, and mortality rates. Ongoing real-time  
79 surveillance (4) and meta-analyses of over 3 million cases of COVID-19 (5) continue to show  
80 that while the incidence of COVID-19 cases are similar between the sexes, adult males are  
81 almost 3-times more likely to be admitted into ICUs and twice as likely to die as females.  
82 Differential exposure to the severe acute respiratory syndrome coronavirus 2 (SARS-CoV-2) is  
83 likely associated with behaviors, occupations, comorbidities and societal and cultural norms (i.e.,  
84 gender differences) that impact the probability of exposure, access to testing, utilization of  
85 healthcare, and risk of disease (6-8). This is distinct but also complementary to biological sex  
86 differences (i.e., sex chromosome complement, reproductive tissues, and sex steroid hormone  
87 concentrations) that can also impact susceptibility and outcomes from COVID-19 (9, 10). While  
88 exposure to SARS-CoV-2 may differ based on gender, the increased mortality rate among males  
89 in diverse countries and at diverse ages likely reflect biological sex. Studies have shown that in  
90 males, mutations in X-linked genes (e.g., *TLR7*) resulting in reduced interferon signaling (11),  
91 elevated proinflammatory cytokine production (e.g., IL-6 and CRP) (2, 12), reduced CD8+ T cell  
92 activity (e.g., IFN- $\gamma$ ) (13), and greater antibody responses (i.e., anti-SARS-CoV-2 antigen-  
93 specific IgM, IgG, and IgA, and neutralizing antibodies) (14) are associated with more severe  
94 COVID-19 outcomes as compared with females. Because COVID-19 outcomes can be impacted  
95 by both gender and biological sex, consideration of the intersection of these contributors is  
96 necessary in human studies (15).

97           Animal models can mechanistically explore sex differences in the pathogenesis of SARS-  
98    CoV-2 independent of confounding gender-associated factors that impact exposure, testing, and  
99    use of healthcare globally. Transgenic mice expressing human ACE2 (K18-hACE2) are  
100   susceptible to SARS-CoV-2 and in this model, males experience greater morbidity than females,  
101   despite having similar viral loads in respiratory tissues (e.g., nasal turbinates, trachea, and lungs)  
102   (16, 17). Transcriptional analyses of lung tissue revealed that inflammatory cytokine and  
103   chemokine gene expression is greater in males than females early during infection, and these  
104   transcriptional patterns show a stronger correlation with disease outcomes among males than  
105   females (16, 17). In addition to utilizing hACE2 mice, mouse-adapted strains of SARS-CoV-2  
106   have been developed and can productively infect wild-type mice but have not yet been used to  
107   evaluate sex-specific differences in the pathogenesis of disease (18-20).

108           Golden Syrian hamsters are also being used as an animal model of SARS-CoV-2  
109    pathogenesis because they are susceptible to human clinical strains of viruses, without the need  
110    for genetic modifications in either the host or virus. While studies have included males and  
111    females in analyses of age-associated differences in the pathogenesis of SARS-CoV-2 (21), few  
112    studies have specifically evaluated males vs. females to better understand sex differences in  
113    disease. There are studies of golden Syrian hamsters that have included male and female  
114    hamsters but did not have sufficient numbers of animals to accurately compare the sexes (22).  
115    Sex differences are not reported in either viral RNA, infectious virus, or cytokine mRNA  
116    expression at a single time point (i.e., 4 days post-infection) in the lungs of golden Syrian  
117    hamsters (23). There is a gap in the literature of studies designed to rigorously test the hypothesis  
118    that biological sex alters disease severity and immune responses after SARS-CoV-2 infection.  
119

120 **Results**

121 *Males experience greater morbidity than females following SARS-CoV-2 infection, which*  
122 *cannot be reversed by estradiol (E2) treatment.*

123 Intranasal inoculation of human clinical isolates of SARS-CoV-2 causes productive  
124 infection in golden Syrian hamsters (24-26). To test the hypothesis that SARS-CoV-2 infection  
125 results in sex differences in disease outcomes, adult male and female golden Syrian hamsters  
126 were infected with  $10^5$  TCID<sub>50</sub> of virus and changes in body mass were monitored for 28 days  
127 post-inoculation (dpi). Mortality was not observed in either sex, but infected hamsters  
128 progressively lost body mass during the first week before starting to recover (**Figure 1A**). The  
129 peak body mass loss in female hamsters was observed at 6 dpi ( $-12.3 \pm 1.8\%$ ), whereas peak mass  
130 loss in male hamsters was observed at 7 dpi ( $-17.3 \pm 1.9\%$ ). The percentage of body mass loss was  
131 significantly greater in male than female hamsters at 8 to 10 dpi and throughout the recovery  
132 period ( $p < 0.05$ ; **Figure 1A**). Recovery to baseline body mass after SARS-CoV-2 infection  
133 occurred within 2 weeks for female and at 3 weeks for male hamsters (**Figure 1A**).

134 To evaluate pulmonary disease in SARS-CoV-2-infected males and females, chest  
135 computed tomography (CT) was performed at the peak of lung disease (7 dpi). As previously  
136 reported by others (26), multiple and bilateral mixed ground-glass opacities (GGO) and  
137 consolidations were detected in both females and males (**Figure 1B** and **Supplementary Figure**  
138 **1**). In order to reduce bias in the visual assessment, we developed an unbiased approach to  
139 quantify lung disease by chest CT. Volumes of interest (VOIs) were drawn to capture total and  
140 diseased (pneumonic) lung volumes (**Figure 1C**). As reported in COVID-19 patients who  
141 underwent CT (27, 28), there was significantly more disease in the lung of male versus female

142 hamsters ( $p<0.05$ ) (**Figure 1D**). These results indicate that infected male hamsters developed  
143 more severe disease, including more extensive lung injury, than females.

144 Previous studies show that estrogens, including but not limited to estradiol (E2), are anti-  
145 inflammatory and can reduce pulmonary tissue damage following respiratory infections,  
146 including with influenza A viruses or *Streptococcus pneumoniae* (29-31). To test the hypothesis  
147 that E2 could dampen inflammation and pulmonary tissue damage to improve outcomes in male  
148 hamsters, males received either exogenous E2 capsules or placebo capsules prior to SARS-CoV-  
149 2 infection. Plasma concentrations of E2 were significantly elevated in E2-treated males  
150 compared with placebo-treated males ( $p<0.05$ ; **Figure 2A**) and were well within the normal  
151 range of plasma concentrations of E2 in cyclic female hamsters (30-700pg/mL) (32). Animals  
152 were followed for 7 dpi and changes in body mass and chest CT score were quantified. There  
153 was no effect of E2-treatment on morbidity as placebo- and E2-treated males had equivalent  
154 percentages of body mass loss (**Figure 2B**). CT findings noted in E2-treated males were similar  
155 to those noted in placebo-treated males (**Supplementary Figure 1**) and chest CT scans revealed  
156 in CT score between groups (**Figure 2C**). Moreover, histopathology demonstrated similar cell  
157 infiltration and pneumonic areas between groups (**Figure 2D**). From these data, we conclude that  
158 the treatment of gonadally-intact males with E2 did not improve morbidity or pulmonary  
159 outcomes from SARS-CoV-2 infection.

160

### 161 *SARS-CoV-2 replication kinetics are similar between the sexes*

162 To test the hypothesis that male-biased disease outcomes were caused by increased virus  
163 load or faster replication kinetics, subsets of infected male and female hamsters were euthanized  
164 at 2, 4, or 7 dpi and infectious virus titers were measured in the respiratory tissue homogenates.

165 The peak infectious virus titers in the nasal turbinates (**Figure 3A**), trachea (**Figure 3B**), and  
166 lungs (**Figure 3C**) were detected at 2 dpi, decreased at 4 dpi, and was cleared at 7 dpi. There  
167 were no sex differences in either peak virus titers or clearance of SARS-CoV-2 from any of the  
168 respiratory tissues tested (**Figure 3A-C**). Although the infectious virus was cleared from the  
169 respiratory tract of most of the hamsters by 7 dpi (**Figure 3A-C**), viral RNA was still detectable  
170 in the lungs at 14 dpi in all of the SARS-CoV-2 infected hamsters, with no differences between  
171 the sexes (**Figure 3D**). These data illustrate that sex differences in the disease phenotype are not  
172 due to differences in infectious virus loads or persistence of viral RNA.

173

#### 174 *Cytokine concentrations in the lungs are comparable between the sexes*

175 To test whether local or systemic cytokine activity differed between the sexes,  
176 concentrations of cytokines were measured in lung and spleen homogenates at 2, 4, or 7 dpi. Sex  
177 differences were not observed 2-7 dpi in the concentrations of IL-1 $\beta$ , TNF- $\alpha$ , , IL-6, IFN- $\alpha$ , IFN-  
178  $\beta$ , IFN-  $\gamma$ , or IL-10 in either lung (**Figure 4A-F**) or spleen (**Supplementary Table 1**)  
179 homogenates. In both male and female hamsters, lung concentrations of IL-1 $\beta$  (**Supplementary**  
180 **Figure 2A**), TNF- $\alpha$  (**Supplementary Figure 2B**), IFN- $\alpha$  (**Supplementary Figure 2D**), and IFN-  
181  $\beta$  (**Supplementary Figure 2E**), but not IL-6 (**Supplementary Figure 2C**), IFN- $\gamma$   
182 (**Supplementary Figure 2F**), or IL-10 (**Supplementary Table 1**), were greater in samples from  
183 infected as compared with sex-matched mock-infected hamsters ( $p < 0.05$  in each case). In  
184 contrast, there was no effect of infection on the concentration of cytokines in the spleen  
185 (**Supplementary Table 1**). To determine if cytokine concentrations correlated with virus titers  
186 from the same lung homogenates, Spearman correlational analyses were performed and revealed  
187 that concentrations of TNF $\alpha$  were positively associated with virus titers at 2 dpi ( $p < 0.05$ ;



188 **Supplementary Figure 3B**) and concentrations of IFN $\beta$  were negatively associated with virus  
189 titers at 4 dpi ( $p < 0.05$ ; **Supplementary Figure 4E**). The concentrations of other cytokines  
190 measured at either 2 or 4 dpi were not associated with virus titers in the lungs (**Supplementary**  
191 **Figures 3-4**) Taken together, these data provide no evidence that male-biased disease outcomes  
192 are caused by differential production of cytokines in response to SARS-CoV-2 during acute  
193 infection.

194

195 *Female hamsters develop greater antibody responses than males during SARS-CoV-2*  
196 *infection*

197 To evaluate whether females developed greater antiviral antibody responses than males,  
198 as is observed in response to influenza A viruses (33), we measured virus-specific  
199 immunoglobulins as well as neutralizing antibody (nAb) titers in plasma and respiratory samples  
200 collected throughout the course of infection. To begin our evaluation, we inactivated SARS-  
201 CoV-2 virions to analyze plasma IgG that recognize diverse virus antigens. Anti-SARS-CoV-2  
202 IgG titers were detected within a week post-infection, with females developing greater antibody  
203 titers than males at 21 and 28 dpi ( $p < 0.05$ ; **Figure 5A**). Using live SARS-CoV-2, we measured  
204 nAb titers in plasma, which were detectable 7-28 dpi, with females having or trending towards  
205 significantly greater titers than males at 14-28 dpi ( $p < 0.05$ ; **Figure 5B**).

206 SARS-CoV-2 infection induces robust antibody responses against the spike or receptor-  
207 binding domain of the spike protein (S-RBD) in humans and in animal models (14, 34, 35). S-  
208 RBD-specific IgM (**Figure 5C**), IgA (**Figure 5D**), and IgG (**Figure 5E**) antibodies were  
209 detected in plasma within a week post-infection. In plasma, anti-S-RBD IgM antibody titers were  
210 significantly greater in females than males at 21 dpi ( $p < 0.05$ ; **Figure 5C**), and anti-S-RBD IgA

211 and IgG antibody titers were significantly greater in females than males at 21 and 28 dpi  
212 ( $p < 0.05$ ; **Figure 5D-E**). Variants of SARS-CoV-2 due to mutations in the RBD of spike protein,  
213 including the N501Y variant, were first reported in the United Kingdom and subsequently  
214 circulated worldwide (36). The mink variant (Y453F), European variant (N439K), and South  
215 African/Brazilian variants (E484K) have raised concerns over increased transmissibility and  
216 escape from host immune responses (37, 38). Considering the emergence of novel variants, we  
217 tested the hypothesis that females would have greater cross-reactive antibody responses to  
218 SARS-CoV-2 variants. Similar to wild type S-RBD (**Figure 5E**), IgG antibody titers against the  
219 S-RBD mutants N501Y, Y453F, N439K, and E484K were significantly greater in female than  
220 male hamsters ( $p < 0.05$  in each case; **Figure 5F**). Overall, IgG responses to the E484K, but not  
221 the N501Y variant, were significantly lower in both sexes as compared with responses to the  
222 wild-type S-RBD ( $p < 0.05$  for main effect of variant; **Figure 5F**).

223 Local antibody responses at the site of infection are critical for SARS-CoV-2 control and  
224 recovery (39, 40). Anti-S-RBD-IgM titers were greatest in the lungs at 7 dpi, being significantly  
225 greater in female than male hamsters ( $p < 0.05$ ; **Figure 6A**). A cornerstone of mucosal humoral  
226 immunity is IgA and anti-S-RBD IgA titers peaked at 7 dpi, with a trend for higher titers in  
227 females than males ( $p = 0.07$ ; **Figure 6B**). By 28 dpi, females still had detectable anti-S-RBD IgA  
228 titers in their lungs, whereas males did not ( $p < 0.05$ ; **Figure 6B**). Anti-S-RBD IgG titers in the  
229 lungs were elevated 7-28 dpi with a higher trend observed at 28dpi in females than males  
230 ( $p = 0.09$ ; **Figure 6C**). In the trachea, but not in nasal turbinate or lung homogenates, females had  
231 significantly greater anti-S-RBD IgG titers than males ( $p < 0.05$ ; **Figure 6D**). In summary, these  
232 data demonstrate that female hamsters develop greater systemic and local antiviral antibody  
233 responses compared with male hamsters during SARS-CoV-2 infection.

234

235 **Discussion**

236           Sex differences in COVID-19 outcomes are well documented (9, 13). There is a critical  
237 need to develop accurate animal models that reflect the male-bias in disease outcomes to better  
238 understand the underlying mechanisms. We show that male hamsters suffer more systemic (body  
239 mass loss) and local (pulmonary pathology) symptoms of SARS-CoV-2 infection than females.  
240 We tested several potential mechanisms that could mediate male-biased outcomes from  
241 infection, including: 1) lack of estrogenic protection, 2) greater virus replication, 3) exacerbated  
242 cytokine responses, and 4) reduced humoral immunity. Our data reveal that females produce  
243 greater antibody responses, both locally in the respiratory tract as well as systemically in plasma,  
244 but if this causes female hamsters to suffer less severe outcomes from SARS-CoV-2 infection  
245 remains to be determined.

246           Clinical manifestations of SARS-CoV-2 infection in hamsters are typically mild, with  
247 reduced body mass after infection consistently observed (21, 24-26). Previous studies have  
248 shown that hamsters lose body mass after infection, reaching peak loss at 5 to 7 dpi, followed by  
249 recovery (24-26). Body mass loss in hamsters, regardless of age, has been associated with the  
250 dose of virus inoculum, with higher dose resulting in greater body mass loss (26, 41). Body mass  
251 loss also is influenced by age; older hamsters (i.e., 7 to 9 months old) had greater mass loss than  
252 younger animals (i.e., 4-6 weeks old) (21, 26). Sex is another factor impacting body mass loss, as  
253 a reliable clinical sign of disease in hamsters following SARS-CoV-2 infection. As reported in  
254 humans, older age and male sex are clinical variables associated with greater clinical  
255 manifestations of disease in hamsters.

256 A novel determinant of clinical disease that was utilized in the current study was  
257 unbiased, quantitative chest CT-imaging analysis. Previous reports describe chest CT findings in  
258 female SARS-CoV-2 infected hamsters only and show lung abnormalities, including  
259 multilobular ground-glass opacities (GGO) and consolidation (26), as observed in patients with  
260 COVID-19 (42). In the current study, CT-imaging revealed that multilobular GGO and  
261 consolidations were observed to a greater extent in male than female SARS-CoV-2-infected  
262 hamsters at 7 dpi. Whether the sexes differ in the recovery of pulmonary damage following  
263 infection requires greater consideration. There are a number of registered clinical trials of  
264 therapeutic E2 administration (NCT04359329 and NCT04539626) in COVID-19, which raised  
265 the question as to whether disease outcomes in male hamsters could be improved through  
266 administration of E2. In this study, pre-treatment of male hamsters with E2 prior to SARS-CoV-  
267 2 infection did not reduce either weight loss, observed histological damage to lung tissue or the  
268 observed multilobular GGO and consolidations.

269 SARS-CoV-2 replicates in the nasal turbinates, trachea, and lungs of infected golden  
270 Syrian hamsters (24, 25). Virus replication peaks in respiratory tissue within 2-4 dpi, with virus  
271 clearance typically occurring within one week (21, 24, 25). Viral RNA, however, is present in  
272 the lungs of infected hamsters beyond 7 dpi (21, 22, 25). We observed peak infectious virus load  
273 in nasal turbinates, trachea, and lungs at 2 dpi, with clearance by 7 dpi. After infectious virus had  
274 been cleared, viral RNA still remained detectable in the lungs up to 14 dpi. Previous studies have  
275 reported that while aged hamsters experience worse disease outcomes than young hamsters, virus  
276 titers in respiratory tissues are similar (21, 26). We further show that although young adult male  
277 hamsters experience worse disease outcomes than female hamsters, sex differences in virus titers  
278 in respiratory tissues are not observed.

279           During SARS-CoV-2 infection of hamsters, cytokine gene expression, including *Tnfa*,  
280 *Ifna*, and *Ifny* in the nasal turbinates and lungs, is triggered at 2 dpi, peaks at 4 dpi, and returns to  
281 baseline by 7 dpi, but comparisons between males and females have not performed (24, 41, 43).  
282 Analyses of protein concentrations of cytokines in lung and spleen homogenates revealed no  
283 differences between males and females during the first week of infection. Although sex  
284 differences were not observed, concentrations of TNF $\alpha$  and IFN $\beta$  were positively and  
285 negatively, respectively, associated with virus replication in lungs, regardless of sex. Our  
286 findings suggest that cytokine production, either locally in the lungs or systemically in the spleen  
287 does not underlie sex differences in clinical manifestations of disease in hamsters and adds to the  
288 growing list of questions about the role of cytokines in the pathogenesis of SARS-CoV-2 in  
289 human populations. The possibility of differences in cellular infiltration into pulmonary tissue  
290 requires greater consideration, which will be feasible only when better reagents, including  
291 antibodies, become available for hamsters.

292           Studies have reported that both IgG and virus neutralizing antibodies are detected in  
293 serum from SARS-CoV-2-infected golden Syrian hamsters as early as 7 dpi and persist through  
294 43 dpi (24, 35, 44). In the present study, females developed greater IgG responses against both  
295 SARS-CoV-2 wild type and variant S-RBD as well as antiviral nAb titers in both plasma and  
296 respiratory tissue homogenates than males. We also showed that mucosal IgA titers are greater  
297 in the lungs of female than male hamsters and are detectable as early as 7 dpi. Passive transfer of  
298 convalescent sera from infected to naïve hamsters as well as reinfection of previously infected  
299 hamsters carrying high antibody titers, have both been shown to provide protection by reducing  
300 virus titers in the respiratory tissues (24, 26). Likewise, hamster models of SARS-CoV-2  
301 immunization have shown an inverse correlation between antibody responses and either virus

302 titers in the respiratory tissues or body mass loss (45). These studies highlight the possible  
303 protective role of antibodies during SARS-CoV-2 infection, which may contribute to faster  
304 recovery in female than male hamsters.

305 Golden Syrian hamsters have already been successfully used in SARS-CoV-2  
306 transmission studies (24, 25, 46), to compare routes of SARS-CoV-2 infection (41, 47), to  
307 evaluate convalescent plasma and monoclonal antibody therapy (24, 26, 48-50), and to test  
308 therapeutics and vaccines (23, 45). This model provides a unique opportunity to understand the  
309 kinetics of SARS-CoV-2 immunopathology not only systemically but also at the site of infection,  
310 the respiratory system. Sex as a biological variable should be considered in all studies utilizing  
311 golden Syrian hamsters for prophylactic and therapeutic treatments against SARS-CoV-2.

312

## 313 **Materials and Methods**

314 ***Viruses, cells, and viral proteins:*** Vero-E6-TMPRSS2 cells were cultured in complete cell  
315 growth medium (CM) comprising Dulbecco's Modified Eagle Medium (DMEM) supplemented  
316 with 10% fetal bovine serum, 1mM glutamine, 1mM sodium pyruvate, and penicillin (100  
317 U/mL) and streptomycin (100 µg/mL) antibiotics (51). The SARS-CoV-2 strain (SARS-CoV-  
318 2/USA-WA1/2020) was obtained from Biodefense and Emerging Infections Research Resources  
319 Repository (NR#52281, BEI Resources, VA, USA). SARS-CoV-2 stocks were generated by  
320 infecting VeroTMPRSS2 cells at a multiplicity of infection (MOI) of 0.01 TCID<sub>50</sub>s per cell and  
321 the infected cell culture supernatant was collected at 72 hours post infection clarified by  
322 centrifugation at 400 g for 10 minutes and then stored at -70C (51). SARS-CoV-2 recombinant  
323 spike receptor-binding domain (S-RBD) protein used for enzyme-linked immunosorbent assay  
324 (ELISA) was expressed and purified using methods described previously (14) or purchased from  
325 SinoBiologicals. To obtain whole inactivated SARS-CoV-2, VeroTMPRSS2 cells were infected

326 at a MOI of 0.01 and the infected cell culture supernatant was collected at 72 hours post  
327 infection. Virus was inactivated by the addition of 0.05% beta-propiolactone (51) followed by  
328 incubation at 4C for 18 hours. The beta-propiolactone was inactivated by incubation at 37C for 2  
329 hours and the inactivated virions were pelleted by ultracentrifugation at 25000g for 1h at 4<sup>0</sup>C and  
330 protein concentration was determined by BCA assay (Thermo Fisher Scientific).

331

332 ***Animal experiments:*** Male and female golden Syrian hamsters (7-8 weeks of age) were  
333 purchased from Envigo (Haslett, MI). Animals were housed under standard housing conditions  
334 (68-76°F, 30-70% relative humidity, 12-12 light-dark cycle) in PNC cages (Allentown, NJ) with  
335 paper bedding (Teklad 7099 TEK-Fresh, Envigo, Indianapolis, IN) in an animal biological safety  
336 level 3 (ABSL-3) facility at the Johns Hopkins University-Koch Cancer Research Building.  
337 Animals were given nesting material (Enviropak, Lab Supply, Fort Worth, TX) and ad libitum  
338 RO water and feed (2018 SX Teklad, Envigo, Madison, WI). After 1-2 weeks of acclimation,  
339 animals (8-10 weeks of age) were inoculated with 10<sup>5</sup> TCID<sub>50</sub> (50% tissue culture infectious  
340 dose) of SARS-CoV-2 USA-WA1/2020) in 100µL DMEM (50µl/naris) through intranasal route  
341 under ketamine (60-80mg/kg) and xylazine (4-5mg/kg) anesthesia administered  
342 intraperitoneally. Control animals received equivalent volume of DMEM. Animals were  
343 randomly assigned to be euthanized at 2, 4, 7, 14, or 28-days post infection (dpi). Body mass was  
344 measured at the day of inoculation (baseline) and endpoint, with daily measurements up to 10 dpi  
345 and on 14, 21, and 28 dpi, when applicable per group. Blood samples were collected pre-  
346 inoculation (baseline) and at days 7, 14, 21, and 28 dpi, when applicable per group. Survival  
347 blood collection was performed on the sublingual vein, whereas terminal bleeding was done by  
348 cardiac puncture under isoflurane (500µl drop jar; Fluriso™, VetOne®, Boise, ID) anesthesia.

349 Blood was collected into EDTA (survival and terminal) and/or sodium citrate tubes (terminal).  
350 Plasma was separated by blood centrifugation at 3500rpm, 15min at 4<sup>0</sup>C. After cardiac puncture,  
351 animals were humanely euthanized using a euthanasia solution (Euthasol<sup>®</sup>, Virbac, Fort Worth,  
352 TX). Nasal turbinates, trachea, and lung samples for antibody/cytokine assays and virus titration  
353 were snap frozen in liquid nitrogen and stored at -80<sup>0</sup>C.

354

355 ***Determination of infectious virus titers and viral genome copies in tissue homogenates:*** To  
356 obtain tissue homogenates, DMEM with 100unit/mL penicillin and 100 µg/mL streptomycin was  
357 added (10% w/v) to tubes containing hamster nasal turbinate, lungs, and tracheal tissue samples.  
358 Lysing Matrix D beads were added to each tube and the samples were homogenized in a  
359 FastPrep-24 bench top bead beating system (MPBio) for 40sec at 6.0m/s, followed by  
360 centrifugation for 5min at 10,000g at room temperature. Samples were returned to ice and the  
361 supernatant was distributed equally into 2 tubes. To inactivate SARS-CoV-2, TritonX100 was  
362 added to one of the tubes to a final concentration of 0.5% and incubated at room temperature for  
363 30 minutes. The homogenates were stored at -70<sup>0</sup>C.

364 Infectious virus titers in respiratory tissue homogenates were determined by TCID<sub>50</sub>  
365 assay (14, 51). Briefly, tissue homogenates were 10-fold serially diluted in infection media (CM  
366 with 2.5% instead of 10% FBS), transferred in sextuplicate into the 96-well plates confluent with  
367 Vero-E6-TMPRSS2 cells, incubated at 37<sup>0</sup>C for 4 days, and stained with naphthol blue-black  
368 solution for visualization. The infectious virus titers in TCID<sub>50</sub>/mL were determined by Reed and  
369 Muench method. For detection of SARS-CoV-2 genome copies, RNA was extracted from lungs  
370 using the Qiagen viral RNA extraction kit (Qiagen) and reverse transcriptase PCR (qPCR) was  
371 performed as described (52).



372

373 ***Computed tomography (CT) and image analysis:*** Live animals were imaged inside in-house  
374 developed; sealed biocontainment devices compliant with BSL-3, as previously reported (53).  
375 Seven days post-infection, SARS-CoV-2-infected males (n=13), females (n=14) and E2 treated  
376 (n=13) hamsters underwent chest CT using the nanoScan PET/CT (Mediso USA, MA, USA)  
377 small animal imager. CT images were visualized and analyzed using VivoQuant 2020 lung  
378 segmentation tool (Invicro, MA, USA) (54). Briefly, an entire lung volume (LV) was created,  
379 and volumes of interests (VOIs) were shaped around the pulmonary lesions using global  
380 thresholding for Hounsfield Units (HU)  $\geq 0$  and disease severity (CT score) was quantified as the  
381 percentage of diseased lung in each animal. The investigators were blinded to the group  
382 assignments.

383

384 ***Hormone replacement and quantification:*** Estradiol (E2) capsules were prepared of Silastic  
385 Brand medical grade tubing (0.062 in. i.d. x 0.125 in. o.d.), 10 mm in length, sealed with Factor  
386 II 6382 RTV Silicone and Elastomer, and filled 5 mm with  $17\beta$ -estradiol (55). Capsules were  
387 incubated overnight in sterile saline at 37°C prior to implantation. The E2 dosage was chosen  
388 because this size capsule has previously been shown to produce blood levels within the  
389 physiological range of E2 measured in intact female hamsters during early proestrus (when E2  
390 levels are at their peak) (56, 57). Circulating concentrations of E2 were measured by a rodent  
391 estradiol ELISA kit as per manufacturer's instructions (Calbiotech, CA) .

392

393 ***Antibody ELISAs:*** Hamster antibody ELISA protocol was modified from human COVID-19  
394 antibody ELISA protocol described previously (14). ELISA plates (96-well plates, Immunol

395 4HBX, Thermo Fisher Scientific) were coated with either spike receptor binding domain (S-  
396 RBD) or whole inactivated SARS-CoV-2 proteins (2 µg/mL, 50µl/well) in 1X PBS and  
397 incubated at 4<sup>0</sup>C overnight. Coated plates were washed thrice with wash buffer (1X PBS + 0.1%  
398 Tween-20), blocked with 3% nonfat milk solution in wash buffer and incubated at room  
399 temperature for 1 hour. After incubation, blocking buffer was discarded and two-fold serially  
400 diluted plasma (starting at 1:100 dilution) or tissue homogenates (starting at 1:10 dilution) were  
401 added and plates were incubated at room temperature for 2 hours. After washing plates 3 times,  
402 HRP-conjugated secondary IgG (1:10000, Abcam, MA, USA), IgA (1:250, Brookwood  
403 Biomedical, AL, USA) or IgM (1:250, Brookwood Biomedical, AL, USA) antibodies were  
404 added. After addition of secondary IgG antibody plates were incubated in room temperature for 1  
405 hour while for IgA and IgM antibodies, plates were incubated at 4<sup>0</sup>C overnight. Sample and  
406 antibody dilution were done in 1% nonfat milk solution in wash buffer. Following washing,  
407 reactions were developed by adding 100µl/well of SIGMAFAST OPD (o-phenylenediamine  
408 dihydrochloride) (MilliporeSigma) solution for 10 min, stopped using 3M hydrochloric acid  
409 (HCL) solution and plates were read at 490nm wavelength using ELISA plate reader (BioTek  
410 Instruments). The endpoint antibody titer was determined by using a cut-off value which is three-  
411 times the absorbance of first dilution of mock (uninfected) animal samples.

412

413 ***Microneutralization assay:*** Heat inactivated (56<sup>0</sup>C, 35min) plasma samples were two-fold  
414 serially diluted in infection media (starting at 1:20 dilution) and incubated with 100 TCID<sub>50</sub> of  
415 SARS-CoV-2. After 1-hour incubation at room temperature, plasma-virus mix was transferred  
416 into 96-well plate confluent with Vero-E6-TMPRSS2 cells in sextuplet. After 6 hours, inocula  
417 were removed, fresh infection media was added, and plates were incubated at 37<sup>0</sup>C for 2 days.

418 Cells were fixed with 4% formaldehyde, stained with Naphthol blue black solution and  
419 neutralizing antibody titer was calculated as described (14).

420

421 **Cytokine ELISAs:** Cytokine concentrations in TritonX100 inactivated lung and spleen  
422 homogenates were determined by individual ELISA kits for hamster IFN- $\alpha$  (mybiosource.com;  
423 MBS010919) IFN- $\beta$  (mybiosource.com; MBS014227), TNF- $\alpha$  (mybiosource.com;  
424 MBS046042), IL-1 $\beta$  (mybiosource.com; MBS283040), IFN $\gamma$  (ARP; EHA0005), IL-10 (ARP;  
425 EHA0008), and IL-6 (ARP; EHA0006) as per the manufacturer's instructions. Samples were  
426 pre-diluted 1:5 to 1:10 as necessary in the appropriate kit sample dilution buffer. Total protein in  
427 the homogenates were measured by BCA assay (Thermo Fisher Scientific).

428

429 **Statistical Analyses:** Statistical analyses were done in GraphPad Prism 9. Changes in body mass  
430 were compared using two-way repeated measures ANOVA followed by Bonferroni's multiple  
431 comparison test. Chest CT scores were compared by unpaired Mann-Whitney test. E2  
432 concentration were compared by two-tailed unpaired t-test. Virus titers and antibody responses  
433 were log transformed and compared using two-way ANOVA or mixed-effects analysis followed  
434 by Bonferroni's multiple comparison test. Cytokine concentrations were normalized to total  
435 protein content in lung homogenates and compared using two-Way ANOVA. Associations  
436 between cytokines and virus titers in lungs were conducted using Spearman correlational  
437 analyses. Differences were considered to be significant at  $p < 0.05$ .

438

439 **Data availability:** All data will be made publicly available upon publication and upon request for  
440 peer review.

441 **Acknowledgements**

442 We are grateful to the Johns Hopkins School of Medicine Vice Dean of Research, Dr.  
443 Antony Rosen, for providing research funds to develop this model and conduct this research. We  
444 also thank the Johns Hopkins COVID-19 Hamster Study Group members for weekly discussions  
445 and participation in these studies, particularly the veterinarians and animal care staff who  
446 ensured proper care of all animals in this study. AP would like to dedicate this manuscript to the  
447 memory of R. Mark Buller, whose collaborations on the golden Syrian hamster model for SARS-  
448 CoV infection formed the basis for this study.

449

450 **Funding.** These studies were supported through the generosity of the collective community of  
451 donors to the Johns Hopkins University School of Medicine for COVID research with  
452 supplemental funds from The Johns Hopkins Center of Excellence in Influenza Research and  
453 Surveillance (CEIRS; HHSN272201400007C; AP, SLK), the NIH/NCI COVID-19 Serology  
454 Center of Excellence U54CA260492 (SLK), the NIH/ORWH/NIA Specialized Center of  
455 Research Excellence in Sex Differences U54AG062333 (SLK), R01AI153349 (SKJ), support  
456 from the Center for Infection and Inflammation Imaging Research (Johns Hopkins University),  
457 and NIH T32OD011089 (JLM).

458

459 **Conflicts of interest.** The authors report none.

460

461 **Contributions.** P.C.K., J.L.M., A.P., S.K.J., and S.L.K. conceptualized and designed the study.  
462 S.D., C.A.R-B., P.S.C., J.S.V., A.A.O., K.F., A.L.M., F.M., M.W., F.R.D., K.A.M-P and S.K.J  
463 designed and performed animal experiments. C.A.R-B, K.F, F.M., and M.W performed chest CT

464 scans. A.P., R.Z., P.M., A.J., N.M, and M.J.B. grew virus, did virus quantification, and produced  
465 antigens required to run ELISAs. S.D., K.L., P.S.C., A.L.M., and A.P. performed antibody  
466 assays. S.D., P.S.C., J.R.C., M.M.L., D.Q., and P.C.K. performed cytokine assays. S.D. and  
467 C.A.R-B ran statistical analyses on data. The Study Group Members performed animal  
468 experiments, tissue processing, and data management. S.D. and S.L.K. wrote the manuscript with  
469 input from all authors. All authors read and provided edits to drafts and approved the final  
470 submission.

471  
472 **References**

- 473  
474
- 475 1. Jin J-M, Bai P, He W, Wu F, Liu X-F, Han D-M, Liu S, Yang J-K. 2020. Gender Differences in  
476 Patients With COVID-19: Focus on Severity and Mortality. *Frontiers in Public Health* 8.
  - 477 2. Meng Y, Wu P, Lu W, Liu K, Ma K, Huang L, Cai J, Zhang H, Qin Y, Sun H, Ding W, Gui L,  
478 Wu P. 2020. Sex-specific clinical characteristics and prognosis of coronavirus disease-19  
479 infection in Wuhan, China: A retrospective study of 168 severe patients. *PLoS Pathog*  
480 16:e1008520.
  - 481 3. Salje H, Tran Kiem C, Lefrancq N, Courtejoie N, Bosetti P, Paireau J, Andronico A, Hoze N,  
482 Richet J, Dubost CL, Le Strat Y, Lessler J, Levy-Bruhl D, Fontanet A, Opatowski L, Boelle  
483 PY, Cauchemez S. 2020. Estimating the burden of SARS-CoV-2 in France. *Science*  
484 369:208-211.
  - 485 4. GlobalHealth5050. November 30, 2020 2020. The Sex, Gender and COVID-19 Project.  
486 <https://globalhealth5050.org/the-sex-gender-and-covid-19-project/>. Accessed  
487 December 28.
  - 488 5. Peckham H, de Gruijter NM, Raine C, Radziszewska A, Ciurtin C, Wedderburn LR, Rosser  
489 EC, Webb K, Deakin CT. 2020. Male sex identified by global COVID-19 meta-analysis as a  
490 risk factor for death and ITU admission. *Nat Commun* 11:6317.
  - 491 6. Klein SL, Dhakal S, Ursin RL, Deshpande S, Sandberg K, Mauvais-Jarvis F. 2020. Biological  
492 sex impacts COVID-19 outcomes. *PLoS pathogens* 16:e1008570.
  - 493 7. Galasso V, Pons V, Profeta P, Becher M, Brouard S, Foucault M. 2020. Gender  
494 differences in COVID-19 attitudes and behavior: Panel evidence from eight countries.  
495 *Proc Natl Acad Sci U S A* 117:27285-27291.
  - 496 8. Scully EP, Schumock G, Fu M, Massaccesi G, Muschelli J, Betz J, Klein EY, West NE,  
497 Garibaldi BT, Bandeen-Roche K, Zeger S, Klein SL, Gupta A, team J-Cr. 2021. Sex and  
498 gender differences in COVID testing, hospital admission, presentation, and drivers of  
499 severe outcomes in the DC/Maryland region. medRxiv.

- 500 9. Scully EP, Haverfield J, Ursin RL, Tannenbaum C, Klein SL. 2020. Considering how  
501 biological sex impacts immune responses and COVID-19 outcomes. *Nat Rev Immunol*  
502 doi:10.1038/s41577-020-0348-8.
- 503 10. Bunders MJ, Altfeld M. 2020. Implications of Sex Differences in Immunity for SARS-CoV-  
504 2 Pathogenesis and Design of Therapeutic Interventions. *Immunity* 53:487-495.
- 505 11. van der Made CI, Simons A, Schuurs-Hoeijmakers J, van den Heuvel G, Mantere T,  
506 Kersten S, van Deuren RC, Steehouwer M, van Reijmersdal SV, Jaeger M, Hofste T, Astuti  
507 G, Corominas Galbany J, van der Schoot V, van der Hoeven H, Hagemolten Of Ten Have W,  
508 Klijn E, van den Meer C, Fiddelaers J, de Mast Q, Bleeker-Rovers CP, Joosten LAB,  
509 Yntema HG, Gilissen C, Nelen M, van der Meer JWM, Brunner HG, Netea MG, van de  
510 Veerdonk FL, Hoischen A. 2020. Presence of Genetic Variants Among Young Men With  
511 Severe COVID-19. *JAMA* doi:10.1001/jama.2020.13719.
- 512 12. Vahidy FS, Pan AP, Ahnstedt H, Munshi Y, Choi HA, Tiruneh Y, Nasir K, Kash BA, Andrieni  
513 JD, McCullough LD. 2021. Sex differences in susceptibility, severity, and outcomes of  
514 coronavirus disease 2019: Cross-sectional analysis from a diverse US metropolitan area.  
515 *PLoS One* 16:e0245556.
- 516 13. Takahashi T, Ellingson MK, Wong P, Israelow B, Lucas C, Klein J, Silva J, Mao T, Oh JE,  
517 Tokuyama M, Lu P, Venkataraman A, Park A, Liu F, Meir A, Sun J, Wang EY, Casanovas-  
518 Massana A, Wyllie AL, Vogels CBF, Earnest R, Lapidus S, Ott IM, Moore AJ, Yale IRT, Shaw  
519 A, Fournier JB, Odio CD, Farhadian S, Dela Cruz C, Grubaugh ND, Schulz WL, Ring AM, Ko  
520 AI, Omer SB, Iwasaki A. 2020. Sex differences in immune responses that underlie COVID-  
521 19 disease outcomes. *Nature* 588:315-320.
- 522 14. Klein SL, Pekosz A, Park HS, Ursin RL, Shapiro JR, Benner SE, Littlefield K, Kumar S, Naik  
523 HM, Betenbaugh MJ, Shrestha R, Wu AA, Hughes RM, Burgess I, Caturegli P,  
524 Laeyendecker O, Quinn TC, Sullivan D, Shoham S, Redd AD, Bloch EM, Casadevall A,  
525 Tobian AA. 2020. Sex, age, and hospitalization drive antibody responses in a COVID-19  
526 convalescent plasma donor population. *J Clin Invest* 130:6141-6150.
- 527 15. Shapiro JR, Klein SL, Morgan R. 2021. COVID-19: use intersectional analyses to close  
528 gaps in outcomes and vaccination. *Nature* 591:202.
- 529 16. Golden JW, Cline CR, Zeng X, Garrison AR, Carey BD, Mucker EM, White LE, Shamblin JD,  
530 Brocato RL, Liu J, Babka AM, Rauch HB, Smith JM, Hollidge BS, Fitzpatrick C, Badger CV,  
531 Hooper JW. 2020. Human angiotensin-converting enzyme 2 transgenic mice infected  
532 with SARS-CoV-2 develop severe and fatal respiratory disease. *JCI Insight* 5.
- 533 17. Oladunni FS, Park JG, Pino PA, Gonzalez O, Akhter A, Allue-Guardia A, Olmo-Fontanez A,  
534 Gautam S, Garcia-Vilanova A, Ye C, Chiem K, Headley C, Dwivedi V, Parodi LM, Alfson KJ,  
535 Staples HM, Schami A, Garcia JI, Whigham A, Platt RN, 2nd, Gazi M, Martinez J, Chuba C,  
536 Earley S, Rodriguez OH, Mdaki SD, Kavelish KN, Escalona R, Hallam CRA, Christie C,  
537 Patterson JL, Anderson TJC, Carrion R, Jr., Dick EJ, Jr., Hall-Ursone S, Schlesinger LS,  
538 Alvarez X, Kaushal D, Giavedoni LD, Turner J, Martinez-Sobrido L, Torrelles JB. 2020.  
539 Lethality of SARS-CoV-2 infection in K18 human angiotensin-converting enzyme 2  
540 transgenic mice. *Nat Commun* 11:6122.
- 541 18. Dinnon KH, Leist SR, Schäfer A, Edwards CE, Martinez DR, Montgomery SA, West A,  
542 Yount BL, Hou YJ, Adams LE, Gully KL, Brown AJ, Huang E, Bryant MD, Choong IC, Glenn

- 543 JS, Gralinski LE, Sheahan TP, Baric RS. 2020. A mouse-adapted model of SARS-CoV-2 to  
544 test COVID-19 countermeasures. *Nature* 586:560-566.
- 545 19. Jiang R-D, Liu M-Q, Chen Y, Shan C, Zhou Y-W, Shen X-R, Li Q, Zhang L, Zhu Y, Si H-R,  
546 Wang Q, Min J, Wang X, Zhang W, Li B, Zhang H-J, Baric RS, Zhou P, Yang X-L, Shi Z-L.  
547 2020. Pathogenesis of SARS-CoV-2 in Transgenic Mice Expressing Human Angiotensin-  
548 Converting Enzyme 2. *Cell* 182:50-58.e8.
- 549 20. Leist SR, Dinnon KH, 3rd, Schäfer A, Tse LV, Okuda K, Hou YJ, West A, Edwards CE,  
550 Sanders W, Fritch EJ, Gully KL, Scobey T, Brown AJ, Sheahan TP, Moorman NJ, Boucher  
551 RC, Gralinski LE, Montgomery SA, Baric RS. 2020. A Mouse-Adapted SARS-CoV-2 Induces  
552 Acute Lung Injury and Mortality in Standard Laboratory Mice. *Cell* 183:1070-1085.e12.
- 553 21. Osterrieder N, Bertzbach LD, Dietert K, Abdelgawad A, Vladimirova D, Kunec D,  
554 Hoffmann D, Beer M, Gruber AD, Trimpert J. 2020. Age-Dependent Progression of SARS-  
555 CoV-2 Infection in Syrian Hamsters. *Viruses* 12.
- 556 22. Rosenke K, Meade-White K, Letko M, Clancy C, Hansen F, Liu Y, Okumura A, Tang-Huau  
557 T-L, Li R, Saturday G, Feldmann F, Scott D, Wang Z, Munster V, Jarvis MA, Feldmann H.  
558 2020. Defining the Syrian hamster as a highly susceptible preclinical model for SARS-  
559 CoV-2 infection. *Emerging Microbes & Infections* 9:2673-2684.
- 560 23. de Melo GD, Lazarini F, Larrous F, Feige L, Kergoat L, Marchio A, Pineau P, Lecuit M,  
561 Lledo P-M, Changeux J-P, Bourhy H. 2020. Anti-COVID-19 efficacy of ivermectin in the  
562 golden hamster. *bioRxiv* doi:10.1101/2020.11.21.392639:2020.11.21.392639.
- 563 24. Chan JF, Zhang AJ, Yuan S, Poon VK, Chan CC, Lee AC, Chan WM, Fan Z, Tsoi HW, Wen L,  
564 Liang R, Cao J, Chen Y, Tang K, Luo C, Cai JP, Kok KH, Chu H, Chan KH, Sridhar S, Chen Z,  
565 Chen H, To KK, Yuen KY. 2020. Simulation of the Clinical and Pathological Manifestations  
566 of Coronavirus Disease 2019 (COVID-19) in a Golden Syrian Hamster Model: Implications  
567 for Disease Pathogenesis and Transmissibility. *Clin Infect Dis* 71:2428-2446.
- 568 25. Sia SF, Yan LM, Chin AWH, Fung K, Choy KT, Wong AYL, Kaewpreedee P, Perera R, Poon  
569 LLM, Nicholls JM, Peiris M, Yen HL. 2020. Pathogenesis and transmission of SARS-CoV-2  
570 in golden hamsters. *Nature* 583:834-838.
- 571 26. Imai M, Iwatsuki-Horimoto K, Hatta M, Loeber S, Halfmann PJ, Nakajima N, Watanabe T,  
572 Ujie M, Takahashi K, Ito M, Yamada S, Fan S, Chiba S, Kuroda M, Guan L, Takada K,  
573 Armbrust T, Balogh A, Furusawa Y, Okuda M, Ueki H, Yasuhara A, Sakai-Tagawa Y, Lopes  
574 TJS, Kiso M, Yamayoshi S, Kinoshita N, Ohmagari N, Hattori SI, Takeda M, Mitsuya H,  
575 Krammer F, Suzuki T, Kawaoka Y. 2020. Syrian hamsters as a small animal model for  
576 SARS-CoV-2 infection and countermeasure development. *Proc Natl Acad Sci U S A*  
577 117:16587-16595.
- 578 27. Moradi B, Ghanaati H, Kazemi MA, Gity M, Hashemi H, Davari-Tanha F, Chavoshi M,  
579 Rouzrokh P, Kolahdouzan K. 2020. Implications of sex difference in CT scan findings and  
580 outcome of patients with COVID-19 pneumonia. *Radiology: Cardiothoracic Imaging*  
581 2:e200248.
- 582 28. Dangis A, De Brucker N, Heremans A, Gillis M, Frans J, Demeyere A, Symons R. 2020.  
583 Impact of gender on extent of lung injury in COVID-19. *Clinical Radiology* 75:554-556.
- 584 29. Xiong Y, Zhong Q, Palmer T, Benner A, Wang L, Suresh K, Damico R, D'Alessio FR. 2021.  
585 Estradiol resolves pneumonia via ER $\beta$  in regulatory T cells. *JCI insight* 6.

- 586 30. Vermillion MS, Ursin RL, Attreed SE, Klein SL. 2018. Estriol reduces pulmonary immune  
587 cell recruitment and inflammation to protect female mice from severe influenza.  
588 *Endocrinology* 159:3306-3320.
- 589 31. Robinson DP, Lorenzo ME, Jian W, Klein SL. 2011. Elevated 17 $\beta$ -estradiol protects  
590 females from influenza A virus pathogenesis by suppressing inflammatory responses.  
591 *PLoS Pathog* 7:e1002149.
- 592 32. Li SA, Xue Y, Xie Q, Li CI, Li JJ. 1994. Serum and tissue levels of estradiol during estrogen-  
593 induced renal tumorigenesis in the Syrian hamster. *The Journal of steroid biochemistry*  
594 *and molecular biology* 48:283-286.
- 595 33. Fink AL, Engle K, Ursin RL, Tang W-Y, Klein SL. 2018. Biological sex affects vaccine  
596 efficacy and protection against influenza in mice. *Proceedings of the National Academy*  
597 *of Sciences* 115:12477-12482.
- 598 34. Ogega CO, Skinner NE, Blair PW, Park HS, Littlefield K, Ganesan A, Dhakal S, Ladiwala P,  
599 Antar AA, Ray SC, Betenbaugh MJ, Pekosz A, Klein SL, Manabe YC, Cox AL, Bailey JR.  
600 2021. Durable SARS-CoV-2 B cell immunity after mild or severe disease. *J Clin Invest*  
601 doi:10.1172/JCI145516.
- 602 35. Hoagland DA, Moller R, Uhl SA, Oishi K, Frere J, Golyner I, Horiuchi S, Panis M, Blanco-  
603 Melo D, Sachs D, Arkun K, Lim JK, tenOever BR. 2021. Leveraging the antiviral type I  
604 interferon system as a first line of defense against SARS-CoV-2 pathogenicity. *Immunity*  
605 doi:10.1016/j.immuni.2021.01.017.
- 606 36. Leung K, Shum MH, Leung GM, Lam TT, Wu JT. 2021. Early transmissibility assessment of  
607 the N501Y mutant strains of SARS-CoV-2 in the United Kingdom, October to November  
608 2020. *Euro Surveill* 26.
- 609 37. Hayashi T, Yaegashi N, Konishi I. 2020. Effect of RBD mutation (Y453F) in spike  
610 glycoprotein of SARS-CoV-2 on neutralizing antibody affinity. *bioRxiv*  
611 doi:10.1101/2020.11.27.401893:2020.11.27.401893.
- 612 38. Thomson EC, Rosen LE, Shepherd JG, Spreafico R, da Silva Filipe A, Wojcechowskyj JA,  
613 Davis C, Piccoli L, Pascall DJ, Dillen J, Lytras S, Czudnochowski N, Shah R, Meury M,  
614 Jesudason N, De Marco A, Li K, Bassi J, O'Toole A, Pinto D, Colquhoun RM, Culap K,  
615 Jackson B, Zatta F, Rambaut A, Jaconi S, Sreenu VB, Nix J, Zhang I, Jarrett RF, Glass WG,  
616 Beltramello M, Nomikou K, Pizzuto M, Tong L, Cameroni E, Croll TI, Johnson N, Di Iulio J,  
617 Wickenhagen A, Ceschi A, Harbison AM, Mair D, Ferrari P, Smollett K, Sallusto F,  
618 Carmichael S, Garzoni C, Nichols J, Galli M, et al. 2021. Circulating SARS-CoV-2 spike  
619 N439K variants maintain fitness while evading antibody-mediated immunity. *Cell*  
620 doi:<https://doi.org/10.1016/j.cell.2021.01.037>.
- 621 39. Sterlin D, Mathian A, Miyara M, Mohr A, Anna F, Claer L, Quentric P, Fadlallah J,  
622 Devilliers H, Ghillani P, Gunn C, Hockett R, Mudumba S, Guihot A, Luyt CE, Mayaux J,  
623 Beurton A, Fourati S, Bruel T, Schwartz O, Lacorte JM, Yssel H, Parizot C, Dorgham K,  
624 Charneau P, Amoura Z, Gorochov G. 2021. IgA dominates the early neutralizing antibody  
625 response to SARS-CoV-2. *Sci Transl Med* 13.
- 626 40. Russell MW, Moldoveanu Z, Ogra PL, Mestecky J. 2020. Mucosal Immunity in COVID-19:  
627 A Neglected but Critical Aspect of SARS-CoV-2 Infection. *Front Immunol* 11:611337.
- 628 41. Lee AC, Zhang AJ, Chan JF, Li C, Fan Z, Liu F, Chen Y, Liang R, Sridhar S, Cai JP, Poon VK,  
629 Chan CC, To KK, Yuan S, Zhou J, Chu H, Yuen KY. 2020. Oral SARS-CoV-2 Inoculation



- 630 Establishes Subclinical Respiratory Infection with Virus Shedding in Golden Syrian  
631 Hamsters. *Cell Rep Med* 1:100121.
- 632 42. Simpson S, Kay FU, Abbara S, Bhalla S, Chung JH, Chung M, Henry TS, Kanne JP,  
633 Kligerman S, Ko JP, Litt H. 2020. Radiological Society of North America Expert Consensus  
634 Statement on Reporting Chest CT Findings Related to COVID-19. Endorsed by the Society  
635 of Thoracic Radiology, the American College of Radiology, and RSNA - Secondary  
636 Publication. *J Thorac Imaging* 35:219-227.
- 637 43. Zhang AJ, Lee AC, Chu H, Chan JF, Fan Z, Li C, Liu F, Chen Y, Yuan S, Poon VK, Chan CC,  
638 Cai JP, Wu KL, Sridhar S, Chan YS, Yuen KY. 2020. SARS-CoV-2 infects and damages the  
639 mature and immature olfactory sensory neurons of hamsters. *Clin Infect Dis*  
640 doi:10.1093/cid/ciaa995.
- 641 44. Brocato RL, Principe LM, Kim RK, Zeng X, Williams JA, Liu Y, Li R, Smith JM, Golden JW,  
642 Gangemi D, Youssef S, Wang Z, Glanville J, Hooper JW. 2020. Disruption of Adaptive  
643 Immunity Enhances Disease in SARS-CoV-2-Infected Syrian Hamsters. *J Virol* 94.
- 644 45. Tostanoski LH, Wegmann F, Martinot AJ, Loos C, McMahan K, Mercado NB, Yu J, Chan  
645 CN, Bondoc S, Starke CE, Nekorchuk M, Busman-Sahay K, Piedra-Mora C, Wrijil LM,  
646 Ducat S, Custers J, Atyeo C, Fischinger S, Burke JS, Feldman J, Hauser BM, Caradonna  
647 TM, Bondzie EA, Dagotto G, Gebre MS, Jacob-Dolan C, Lin Z, Mahrokhian SH, Nampanya  
648 F, Nityanandam R, Pessaint L, Porto M, Ali V, Benetiene D, Tevi K, Andersen H, Lewis  
649 MG, Schmidt AG, Lauffenburger DA, Alter G, Estes JD, Schuitemaker H, Zahn R, Barouch  
650 DH. 2020. Ad26 vaccine protects against SARS-CoV-2 severe clinical disease in hamsters.  
651 *Nat Med* 26:1694-1700.
- 652 46. Chan JF, Yuan S, Zhang AJ, Poon VK, Chan CC, Lee AC, Fan Z, Li C, Liang R, Cao J, Tang K,  
653 Luo C, Cheng VC, Cai JP, Chu H, Chan KH, To KK, Sridhar S, Yuen KY. 2020. Surgical Mask  
654 Partition Reduces the Risk of Noncontact Transmission in a Golden Syrian Hamster  
655 Model for Coronavirus Disease 2019 (COVID-19). *Clin Infect Dis* 71:2139-2149.
- 656 47. Port JR, Yinda CK, Owusu IO, Holbrook M, Fischer R, Bushmaker T, Avanzato VA, Schulz  
657 JE, van Doremalen N, Clancy CS, Munster VJ. 2020. SARS-CoV-2 disease severity and  
658 transmission efficiency is increased for airborne but not fomite exposure in Syrian  
659 hamsters. *bioRxiv* doi:10.1101/2020.12.28.424565.
- 660 48. Baum A, Ajithdoss D, Copin R, Zhou A, Lanza K, Negron N, Ni M, Wei Y, Mohammadi K,  
661 Musser B, Atwal GS, Oyejide A, Goez-Gazi Y, Dutton J, Clemmons E, Staples HM, Bartley  
662 C, Klaffke B, Alfson K, Gazi M, Gonzalez O, Dick E, Jr., Carrion R, Jr., Pessaint L, Porto M,  
663 Cook A, Brown R, Ali V, Greenhouse J, Taylor T, Andersen H, Lewis MG, Stahl N, Murphy  
664 AJ, Yancopoulos GD, Kyrtatsous CA. 2020. REGN-COV2 antibodies prevent and treat  
665 SARS-CoV-2 infection in rhesus macaques and hamsters. *Science* 370:1110-1115.
- 666 49. Kreye J, Reincke SM, Kornau HC, Sanchez-Sendin E, Corman VM, Liu H, Yuan M, Wu NC,  
667 Zhu X, Lee CD, Trimpert J, Holtje M, Dietert K, Stoffler L, von Wardenburg N, van Hoof S,  
668 Homeyer MA, Hoffmann J, Abdelgawad A, Gruber AD, Bertzbach LD, Vladimirova D, Li  
669 LY, Barthel PC, Skriner K, Hocke AC, Hippenstiel S, Wizenrath M, Suttorp N, Kurth F,  
670 Franke C, Endres M, Schmitz D, Jeworowski LM, Richter A, Schmidt ML, Schwarz T,  
671 Muller MA, Drosten C, Wendisch D, Sander LE, Osterrieder N, Wilson IA, Pruss H. 2020.  
672 A Therapeutic Non-self-reactive SARS-CoV-2 Antibody Protects from Lung Pathology in a  
673 COVID-19 Hamster Model. *Cell* 183:1058-1069 e19.

- 674 50. Schafer A, Muecksch F, Lorenzi JCC, Leist SR, Cipolla M, Bournazos S, Schmidt F, Maison  
675 RM, Gazumyan A, Martinez DR, Baric RS, Robbiani DF, Hatzioannou T, Ravetch JV,  
676 Bieniasz PD, Bowen RA, Nussenzweig MC, Sheahan TP. 2021. Antibody potency, effector  
677 function, and combinations in protection and therapy for SARS-CoV-2 infection in vivo. *J*  
678 *Exp Med* 218.
- 679 51. Schaecher SR, Mackenzie JM, Pekosz A. 2007. The ORF7b protein of severe acute  
680 respiratory syndrome coronavirus (SARS-CoV) is expressed in virus-infected cells and  
681 incorporated into SARS-CoV particles. *J Virol* 81:718-31.
- 682 52. Gniazdowski V, Morris CP, Wohl S, Mehoke T, Ramakrishnan S, Thielen P, Powell H,  
683 Smith B, Armstrong DT, Herrera M, Reifsnnyder C, Sevdali M, Carroll KC, Pekosz A,  
684 Mostafa HH. 2020. Repeat COVID-19 Molecular Testing: Correlation of SARS-CoV-2  
685 Culture with Molecular Assays and Cycle Thresholds. *Clin Infect Dis*  
686 doi:10.1093/cid/ciaa1616.
- 687 53. Ordonez AA, Wintaco LM, Mota F, Restrepo AF, Ruiz-Bedoya CA, Reyes CF, Uribe LG,  
688 Abhishek S, D'Alessio FR, Holt DP, Dannals RF, Rowe SP, Castillo VR, Pomper MG,  
689 Granados U, Jain S. 2021. Imaging Enterobacteriales Infections in Patients using  
690 Pathogen-specific Positron Emission Tomography. *Science Translational Medicine* In  
691 press.
- 692 54. Hesterman J, Ghayoor A, Novick A, Wang X, Cadornet Y, Becerra L, Gunn R, Avants B.  
693 2019. Multi-atlas approaches for image segmentation across modality, species and  
694 application area. *future* 6:7.
- 695 55. Potluri T, Fink AL, Sylvia KE, Dhakal S, Vermillion MS, Vom Steeg L, Deshpande S,  
696 Narasimhan H, Klein SL. 2019. Age-associated changes in the impact of sex steroids on  
697 influenza vaccine responses in males and females. *NPJ Vaccines* 4:29.
- 698 56. Faruzzi AN, Solomon MB, Demas GE, Huhman KL. 2005. Gonadal hormones modulate  
699 the display of submissive behavior in socially defeated female Syrian hamsters.  
700 *Hormones and behavior* 47:569-575.
- 701 57. Albers HE, Prishkolnik J. 1992. Sex differences in odor-stimulated flank marking in the  
702 golden hamster (*Mesocricetus auratus*). *Hormones and behavior* 26:229-239.

703  
704  
705

**Figure legends:**

706 **Figure 1: SARS-CoV-2 infected male hamsters experience greater disease than females.** To  
707 evaluate morbidity, the percent change in body mass from pre-inoculation was measured up to  
708 28 dpi (A). Representative coronal, transverse, and sagittal chest CT from SARS-CoV-2-infected  
709 male and female animals are shown (B). Lung lesions (GGO, consolidation and air  
710 bronchogram) are marked by the dashed yellow lines. Maximum intensity projections (MIP)  
711 marking total (red) and diseased lung (yellow) for both males and females are shown (C). The

712 CT score is higher in male versus female hamsters at 7 dpi (D). Weights are represented as  
713 mean  $\pm$  standard error of the mean from two independent replications (n = 9-10/group), and  
714 significant differences between groups are denoted by asterisks (\*p<0.05) based on two-way  
715 repeated measures ANOVA followed by Bonferroni's multiple comparison (A). Chest CT data is  
716 represented as median  $\pm$  interquartile range from two independent replication (13-14/group) and  
717 significant differences between groups are denoted in asterisk (\*p<0.05) based on unpaired two-  
718 tailed Mann-Whitney test (D).

719

720 **Figure 2: SARS-CoV-2 infected male hamsters treated with estradiol (E2) developed**  
721 **similar lung pathology as placebo-treated males.** Male hamsters were treated with E2 capsules  
722 or placebo capsules prior to SARS-CoV-2 infection. Estrogen levels were quantified in plasma at  
723 7 dpi (A). Change in body mass for E2- and placebo-treated males were quantified (B). CT score  
724 shows no difference between E2-treated males and placebo-treated males (C). Histopathology  
725 (H&E) in a representative SARS-CoV-2-infected placebo-treated male and E2-treated male  
726 hamster lungs at 4X magnification are shown (D). The dashed yellow lines indicate lung lesions  
727 (GGO, consolidations and air bronchogram). E2 concentrations represented as mean  $\pm$  standard  
728 error of the mean of two independent experiments (n=11-12/group) and significant differences  
729 between groups are denoted in asterisk (\*p<0.05) based on two-tailed unpaired t-test (A). Weight  
730 represented as mean  $\pm$  standard error of the mean of two independent experiments (n=13/group)  
731 (B). Chest CT data represented as median  $\pm$  interquartile range (IQ) from two independent  
732 experiments (n = 13/group) (C).

733

734 **Figure 3: Virus titers were comparable in the respiratory system of SARS-CoV-2 infected**  
735 **male and female hamsters.** Adult (8-10 weeks) male and female golden Syrian hamsters were  
736 infected with  $10^5$  TCID<sub>50</sub> of SARS-CoV-2. Infectious virus titers in the homogenates of nasal  
737 turbinates (A), trachea (B), and lungs (C), were determined by TCID<sub>50</sub> assay on 2, 4, and 7 dpi.  
738 Likewise, virus RNA copies in 100ng of total RNA were tested in the lungs of infected hamsters  
739 at 2, 4, 7, 14 and 28 dpi (D). Data represent mean  $\pm$  standard error of the mean from one or two  
740 experiment(s) (n = 3-5/group) and were analyzed by two-way ANOVA (mixed-effects analysis)  
741 followed by Bonferroni's multiple comparison test.

742

743 **Figure 4: Cytokine responses in the lungs of SARS-CoV-2 infected male and female**  
744 **hamsters were comparable.** Adult (8-10 weeks) male and female golden Syrian hamsters were  
745 infected with  $10^5$  TCID<sub>50</sub> of SARS-CoV-2. Subsets of animals were euthanized at different dpi  
746 and IL-1 $\beta$  (A), TNF- $\alpha$  (B), IL-6 (C), IFN- $\alpha$  (D), IFN- $\beta$  (E), and IFN- $\gamma$  (F) cytokine  
747 concentrations (pg/mg total protein) were determined in the lungs by ELISA. Mock-infected  
748 animal samples from different dpi were presented together as 0 dpi. Data represent  
749 mean  $\pm$  standard error of the mean from one or two independent experiments (n = 2-6/group/sex)  
750 and were analyzed by two-way ANOVA (mixed-effects analysis) followed by Bonferroni's  
751 multiple comparison test.

752

753 **Figure 5: Antibody responses in the plasma of SARS-CoV-2 infected female hamsters were**  
754 **greater than males.** Plasma samples were collected at different dpi and IgG antibody responses  
755 against whole inactivated SARS-CoV-2 virions (A); virus neutralizing antibody responses (B);  
756 and S-RBD-specific IgM (C), IgA (D), and IgG (E) antibodies were determined. Likewise, cross-

757 reactive IgG antibodies against mutant S-RBDs (viz. N501Y, Y453F, N439K, and E484K) were  
758 evaluated in plasma at 28 dpi (F). Considering similar antibody responses at 6 and 7 dpi, values  
759 were presented together as 7 dpi. Data represent mean  $\pm$  standard error of the mean from two  
760 independent experiments (n = 4-14/group/sex) and significant differences between groups are  
761 denoted by asterisks (\*p<0.05) based on two-way ANOVA (mixed-effects analysis) followed by  
762 Bonferroni's multiple comparison test.

763

764 **Figure 6: Antibody responses in the respiratory system of SARS-CoV-2 infected female**  
765 **hamsters were greater than males.** Lung homogenates were prepared at different dpi and S-  
766 RBD-specific IgM (A), IgA (B), and IgG (C) antibodies were determined. Likewise, S-RBD-  
767 specific IgG antibodies were tested in the homogenates of nasal turbinates, trachea, and lungs at  
768 28 dpi (D). Data represent mean  $\pm$  standard error of the mean from one or two independent  
769 experiment(s) (n = 3-10/group) and significant differences between groups are denoted by  
770 asterisks (\*p<0.05) based on two-way ANOVA (mixed-effects analysis) followed by  
771 Bonferroni's multiple comparison test.

772

773 **Supplementary Figure 1:** Representative transverse chest CT of five females, placebo-treated  
774 males, and E2-treated male hamsters at 7 dpi. Multiple bilateral and peripheric ground-glass  
775 opacities (GGO) and mixed GGO with consolidations are the hallmarks findings at the peak of  
776 lung disease.

777

778 **Supplementary Figure 2:** Kinetics of cytokine concentrations (pg/mg total protein) in the lungs  
779 of SARS-CoV-2 infected hamsters. Male and female golden Syrian hamsters were infected with

780  $10^5$  TCID<sub>50</sub> of SARS-CoV-2. Subsets of animals were euthanized at different dpi and IL-1 $\beta$  (A),  
781 TNF- $\alpha$  (B), IL-6 (C), IFN- $\alpha$  (D), IFN- $\beta$  (E), and IFN- $\gamma$  (F) concentrations were determined in the  
782 lungs by ELISA. Mock-infected animal samples from 2-, 4-, or 7-days post infection (dpi) were  
783 not statistically different and were combined and presented together as 0 dpi. Data represent  
784 mean  $\pm$  standard error of the mean from one or two independent experiments (n = 6-12/group)  
785 with significant differences between groups denoted by asterisks (\*p<0.05) based on one-way  
786 ANOVA followed by Dunnett's multiple comparisons test.

787

788 **Supplementary Figure 3:** Associations between concentrations (pg/mg total protein) of IL-1 $\beta$   
789 (A), TNF- $\alpha$  (B), IL-6 (C), IFN- $\alpha$  (D), IFN- $\beta$  (E), and IFN- $\gamma$  (F) and virus titers in lungs collected  
790 2 days post infection (dpi). Data were analyzed with Spearman correlation analyses with  
791 significant associations represented with the R statistic and associated p-value.

792

793 **Supplementary Figure 4:** Associations between concentrations (pg/mg total protein) of IL-1 $\beta$   
794 (A), TNF- $\alpha$  (B), IL-6 (C), IFN- $\alpha$  (D), IFN- $\beta$  (E), and IFN- $\gamma$  (F) and virus titers in lungs collected  
795 4 days post infection (dpi). Data were analyzed with Spearman correlation analyses with  
796 significant associations represented with the R statistic and associated p-value.

797

798 **Supplementary Table 1:** Concentrations (pg/mg total protein) of cytokines in the lungs and  
799 spleen of male and female hamsters at different days post infection (dpi). Mock-infected animal  
800 samples from different dpi were pooled and used as 0 dpi. Data are presented as the  
801 mean  $\pm$  standard error of the mean from one or two independent experiments (n = 6-12/group)

802 with no significant differences observed between the groups based on two-way ANOVA (mixed-  
803 effects analysis) followed by Bonferroni's multiple comparison test.

**Figure 1**

**A**

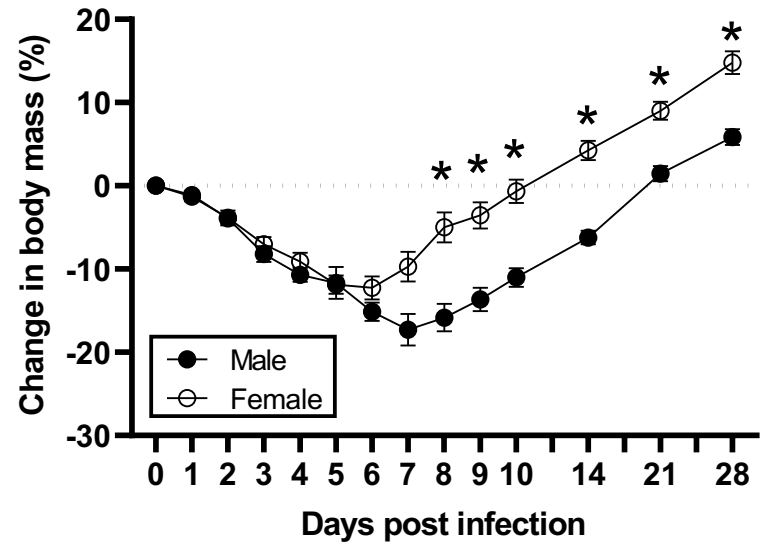

**B**

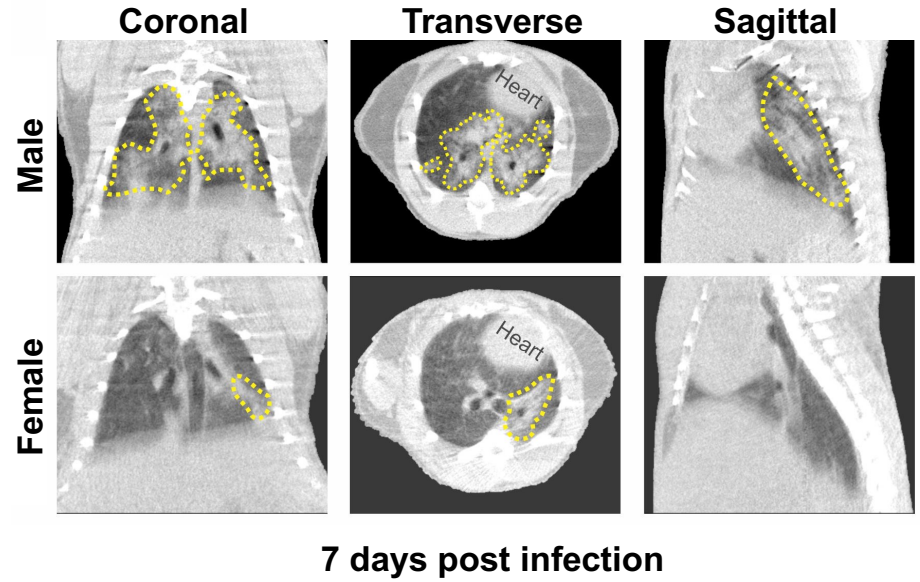

**C**

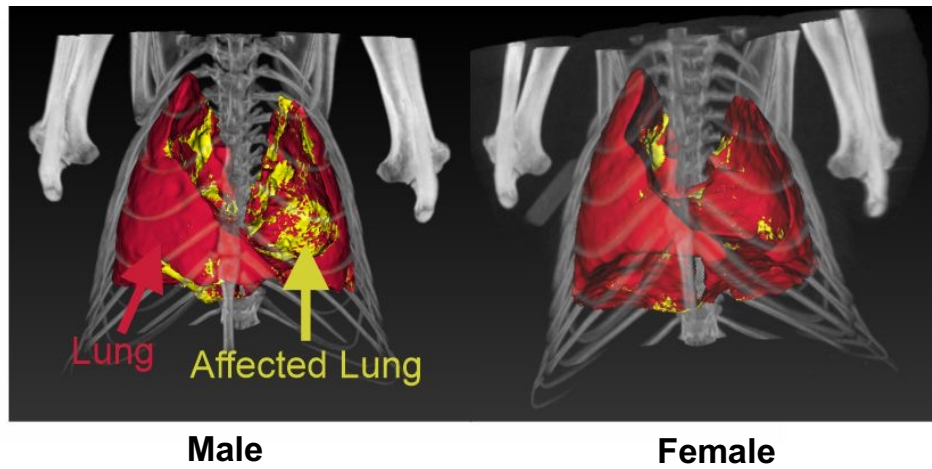

**D**

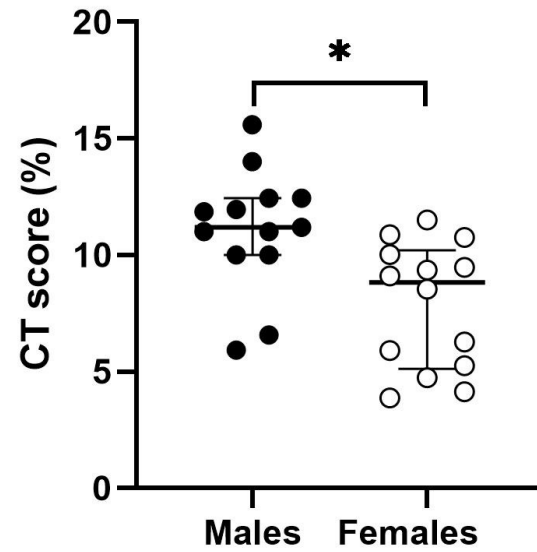



**Figure 2**

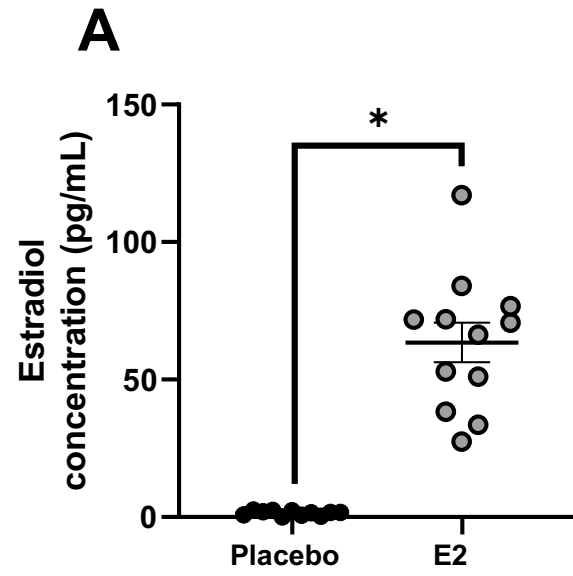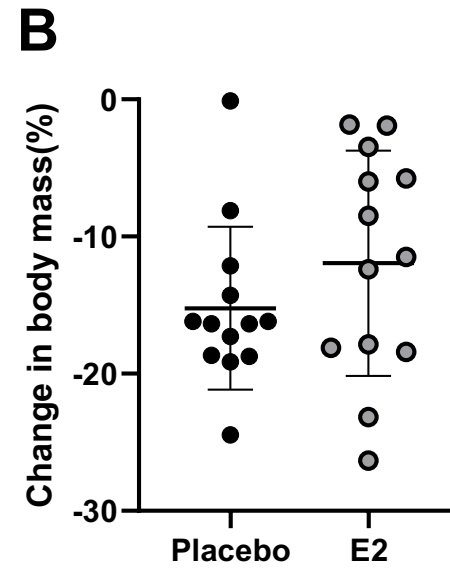

**C**

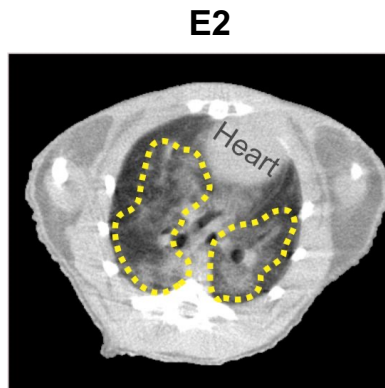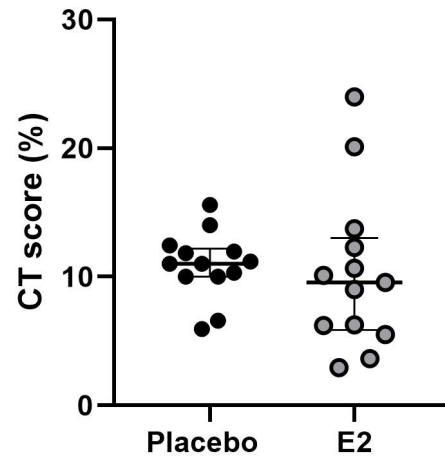

**D**

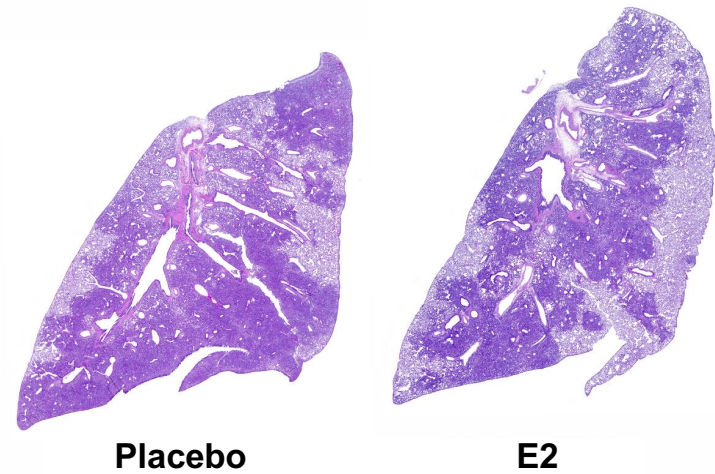

Figure 3

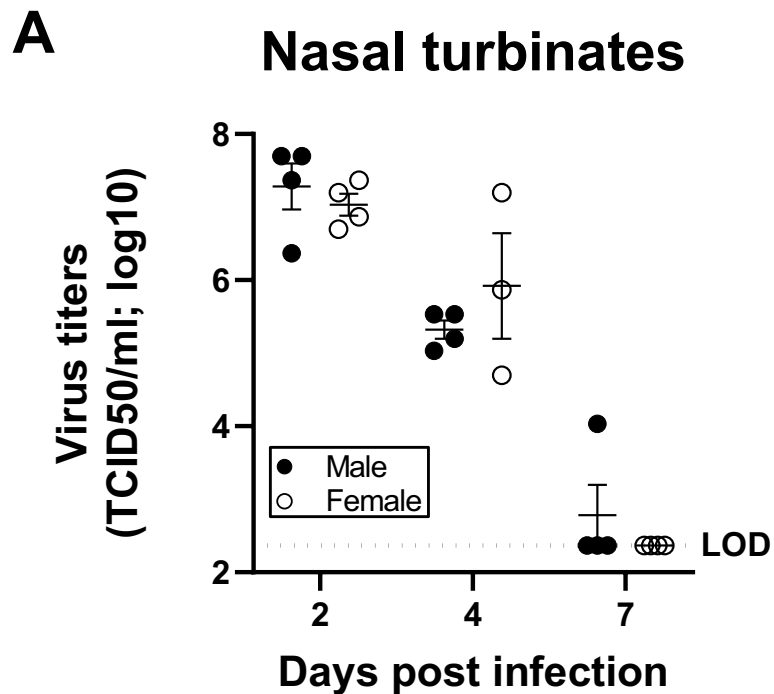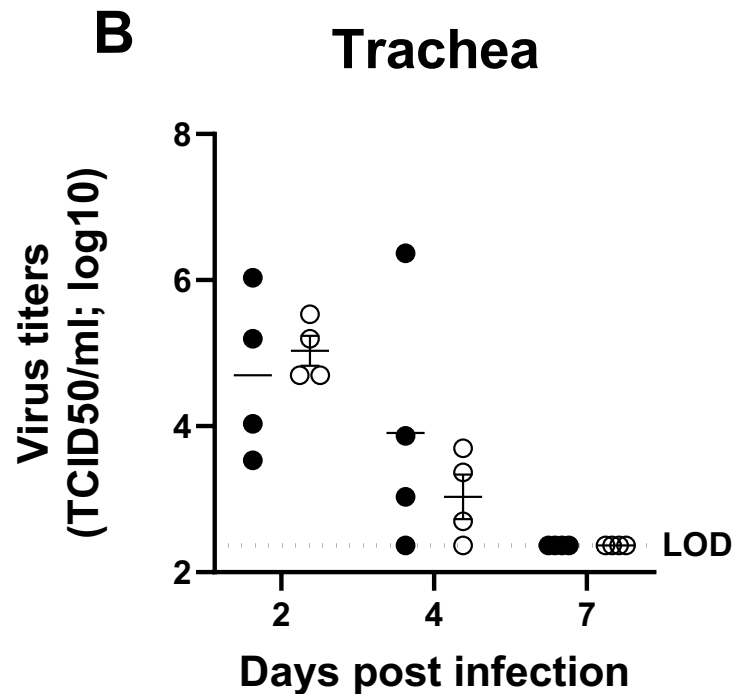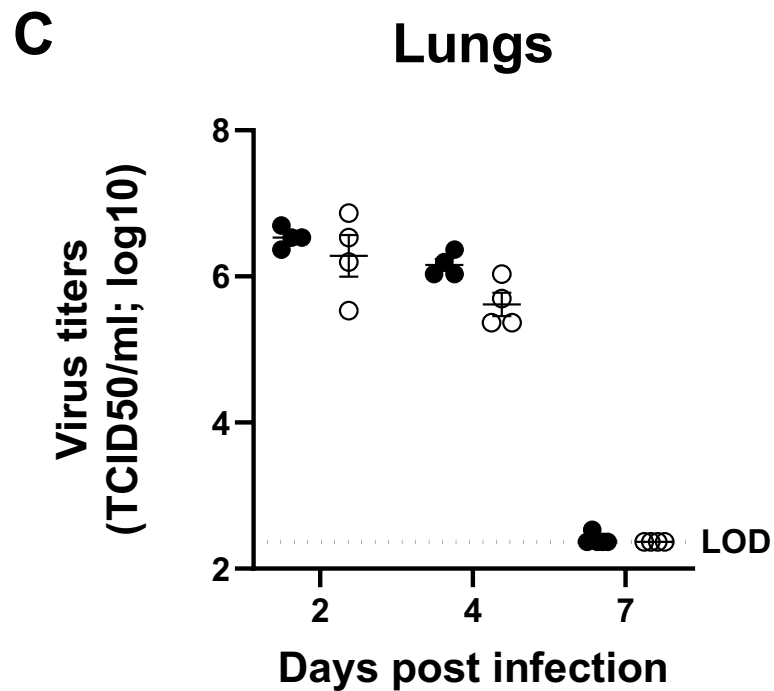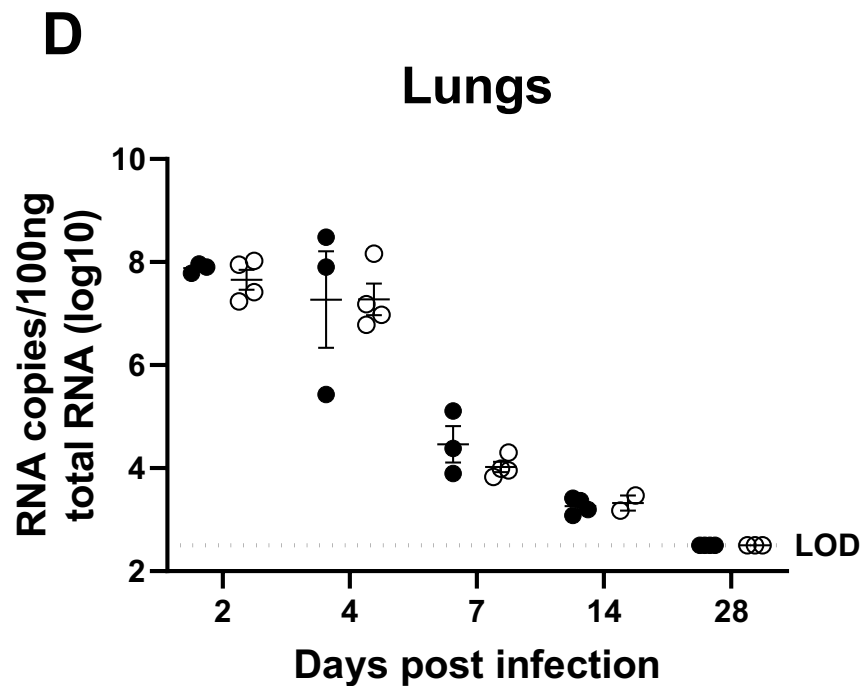

# Figure 4

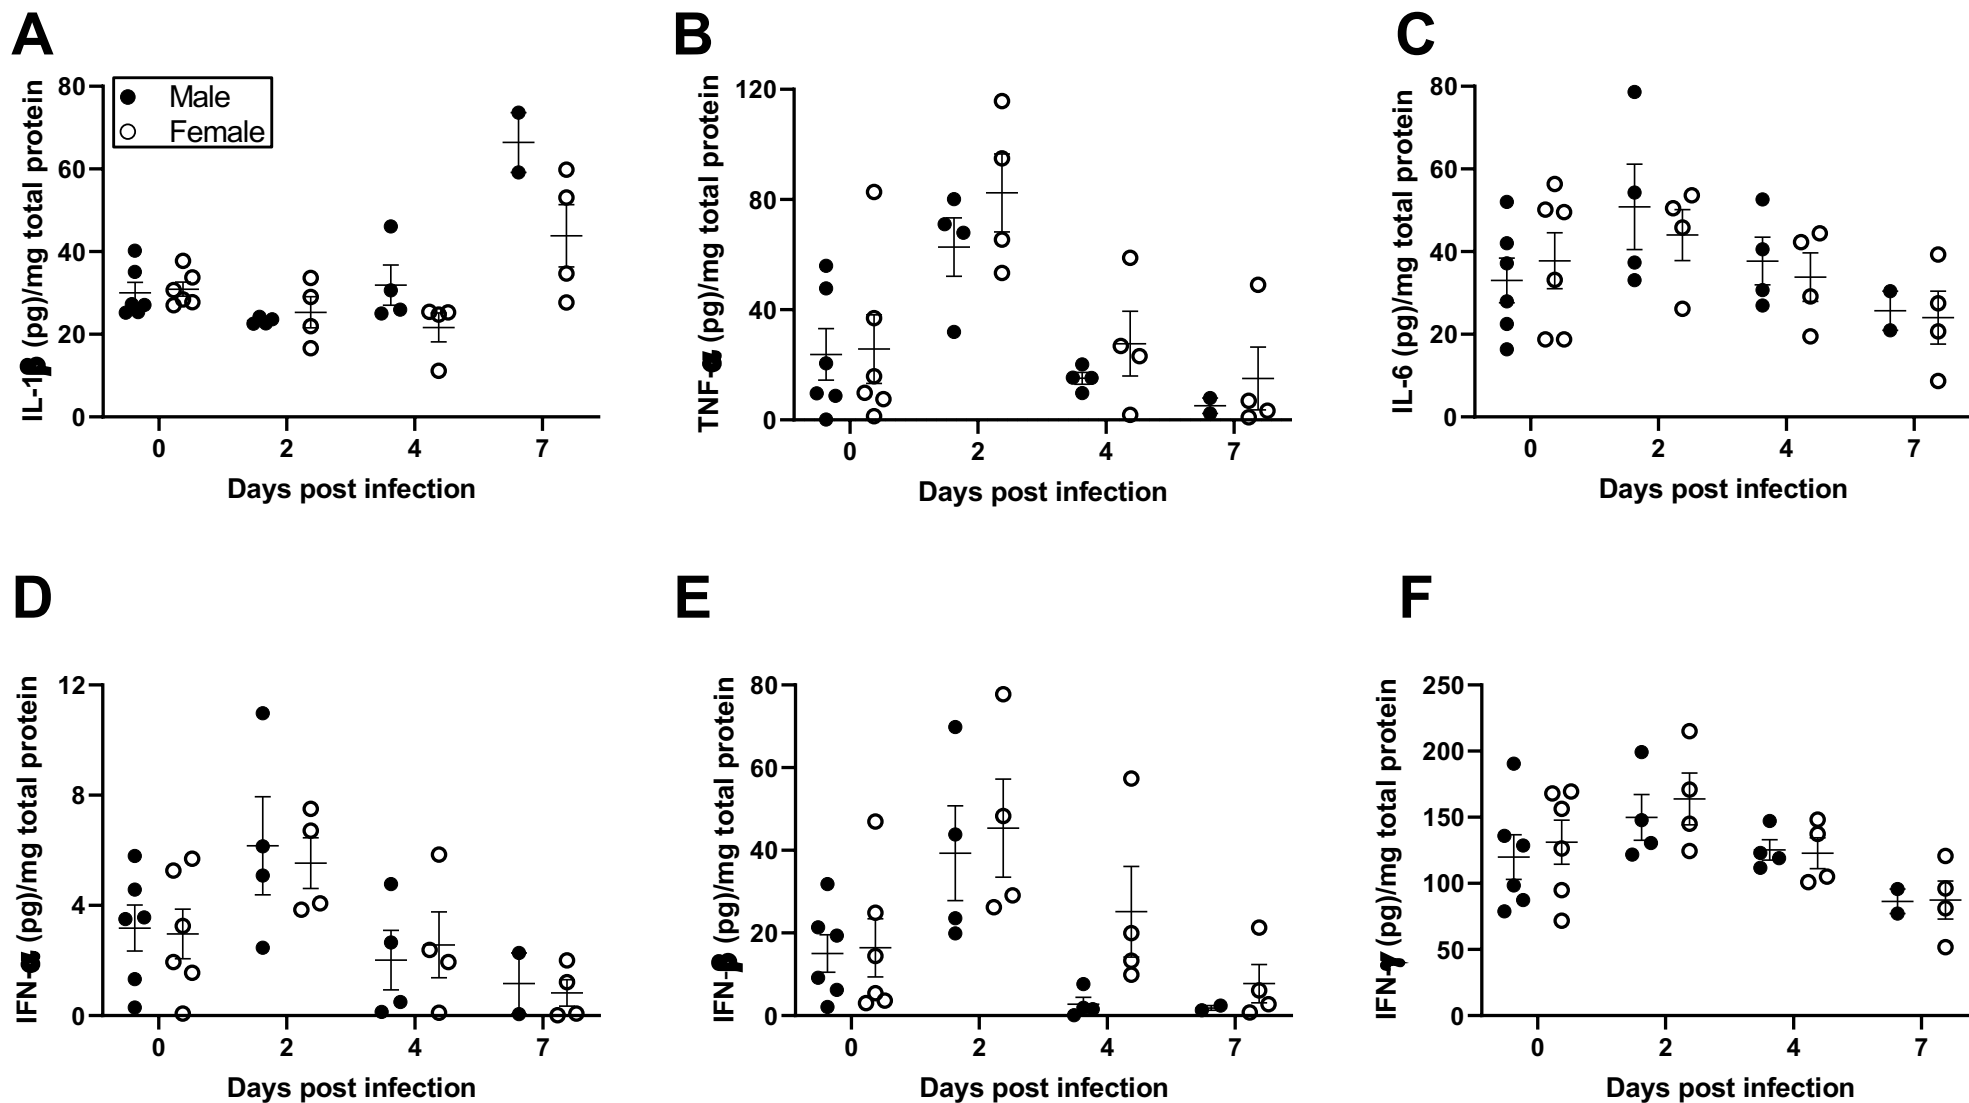

# Figure 5

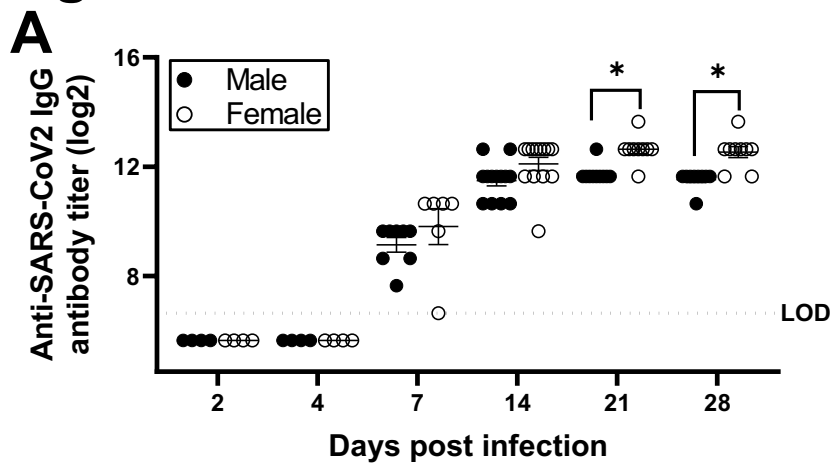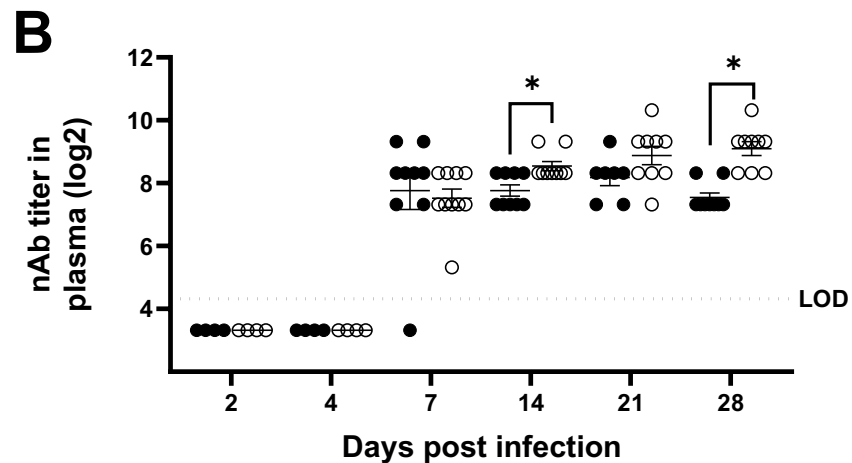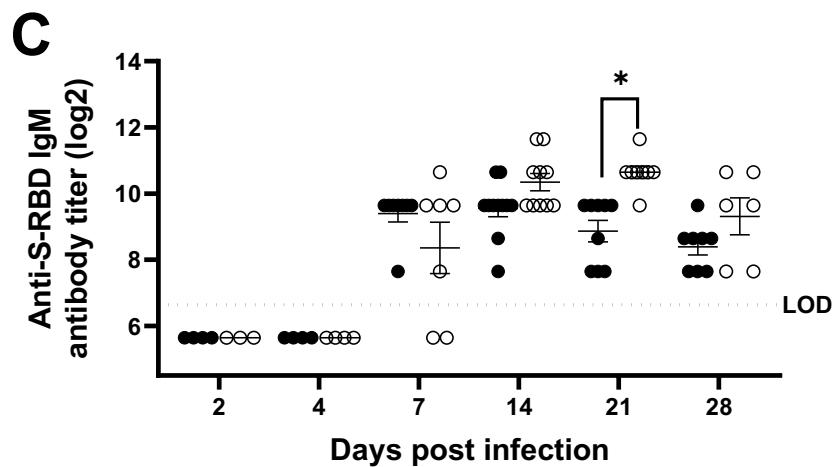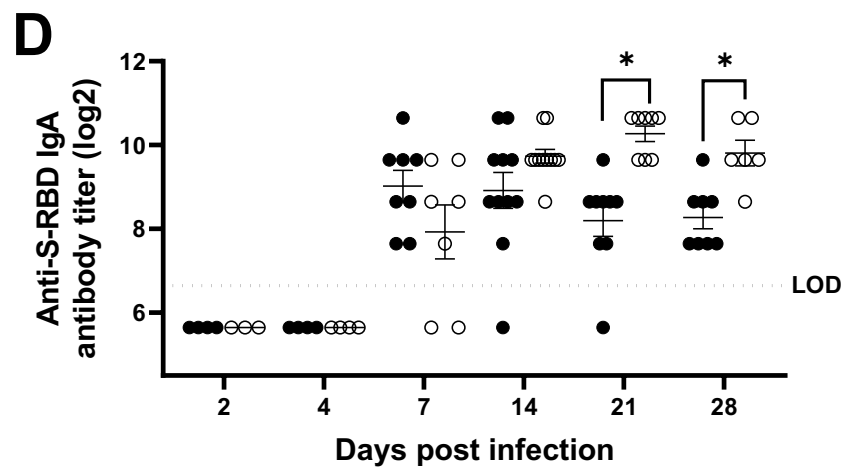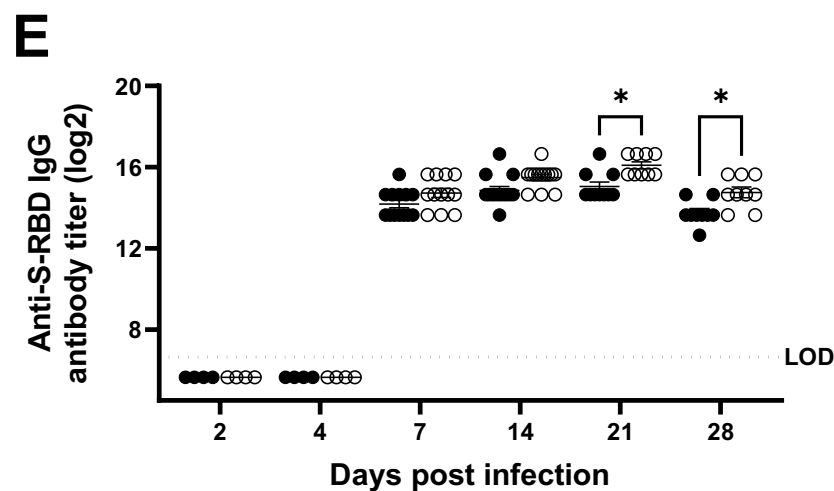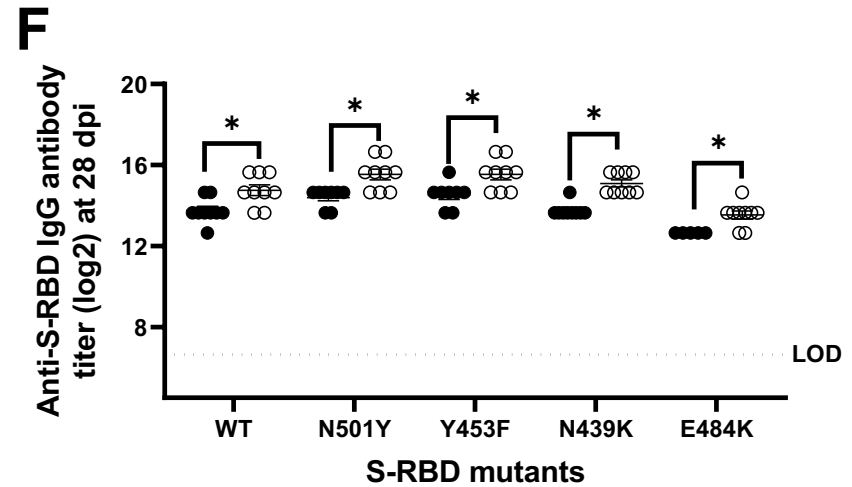

# Figure 6

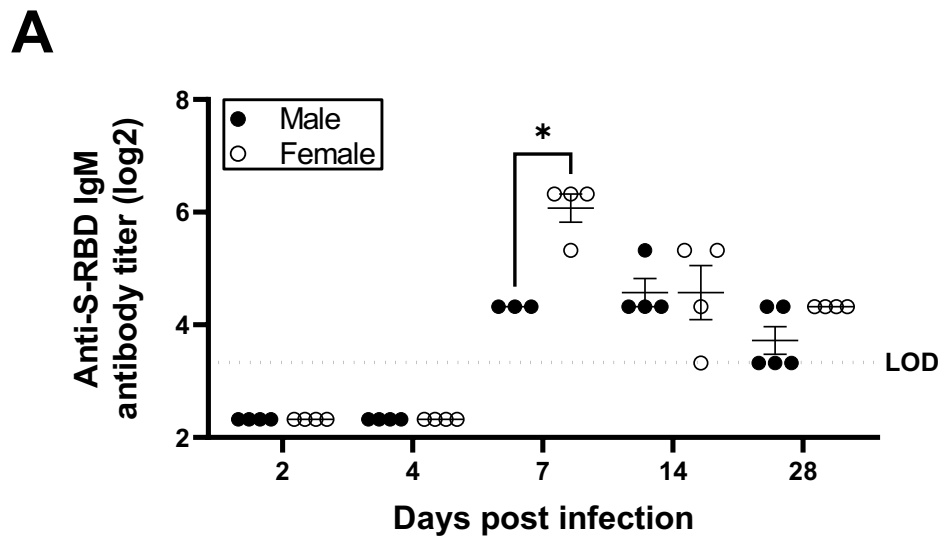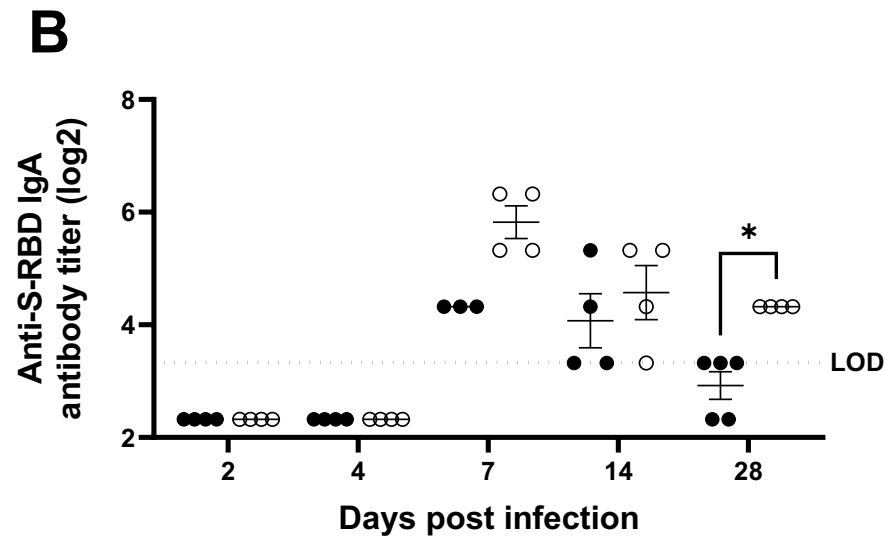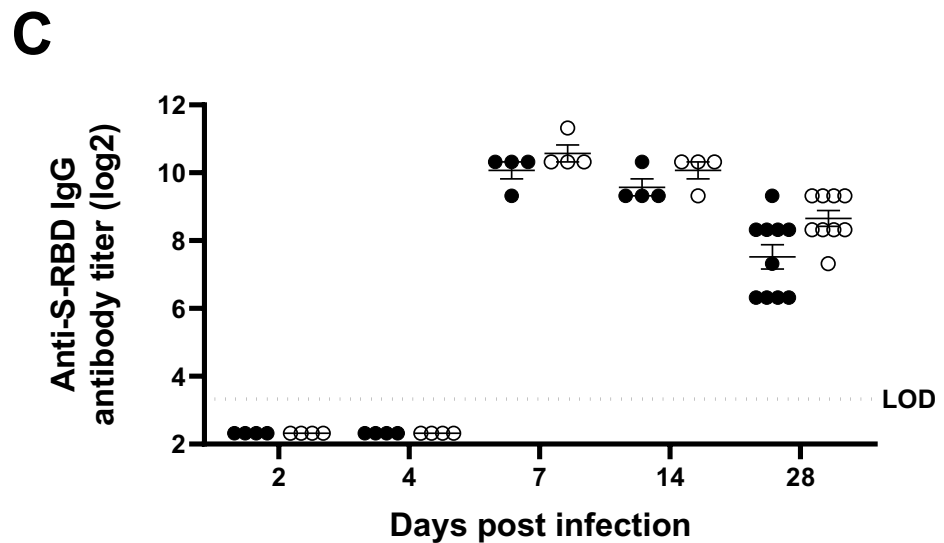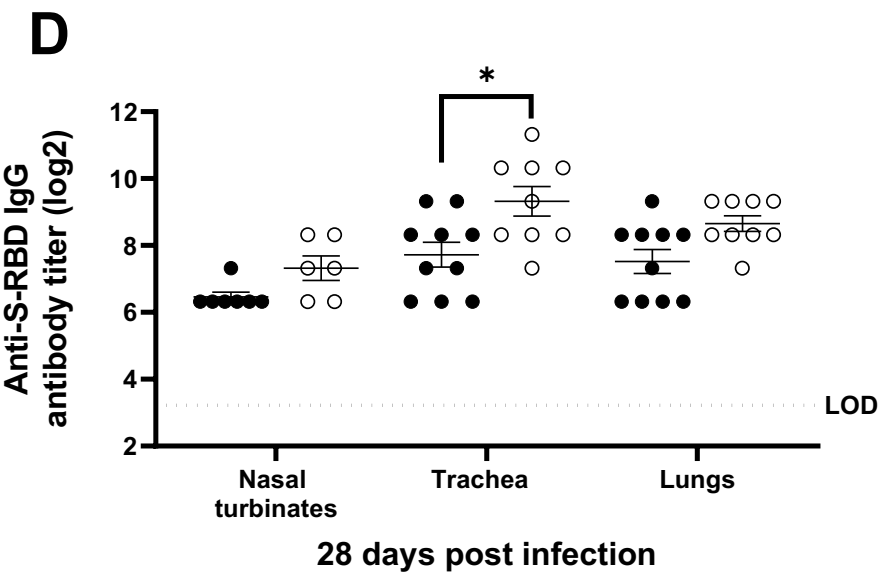

Source: https://biorxiv.org/content/10.1101/2021.04.02.438292v1.full.pdf
